# Supplementary material for: Acylated Flavone O-Glucuronides from the Aerial Parts of Nepeta curviflora
Source: MDPI journal article supplement (doi:10.3390/molecules25173782), 2020-08-20

# Acylated flavone *O*-glucuronides from the aerial parts of *Nepeta curviflora*

Maysaa Rabee, Øyvind M. Andersen, Torgils Fossen, Kjersti Hasle Enerstvedt, Hijazi Abu Ali  
and Saleh Rayyan

Supplementary data  
NMR spectra

# Table of content

- **Page 1:** Title page
- **Page 2:** Table of content
- **Page 3-10:** NMR and Mass spectra of compound **1**
- **Page 11:** High resolution mass spectrum of compound **1**.
- **Page 12:** Mass spectra of the non-methylated version of compound **1**.
- **Page 13-18:** NMR spectra of compound **2**.
- **Page 19:** High resolution mass spectrum of compound **2**.
- **Page 20:** Mass spectra of the non-methylated version of compound **2**.

**Figure S1.** 1D  $^1\text{H}$  NMR spectrum of apigenin 7-*O*-(2''-*O*-(2'''-(*E*-caffeoyl)- $\beta$ -glucuronopyranosyl)- $\beta$ -glucuronopyranoside) (**1**)

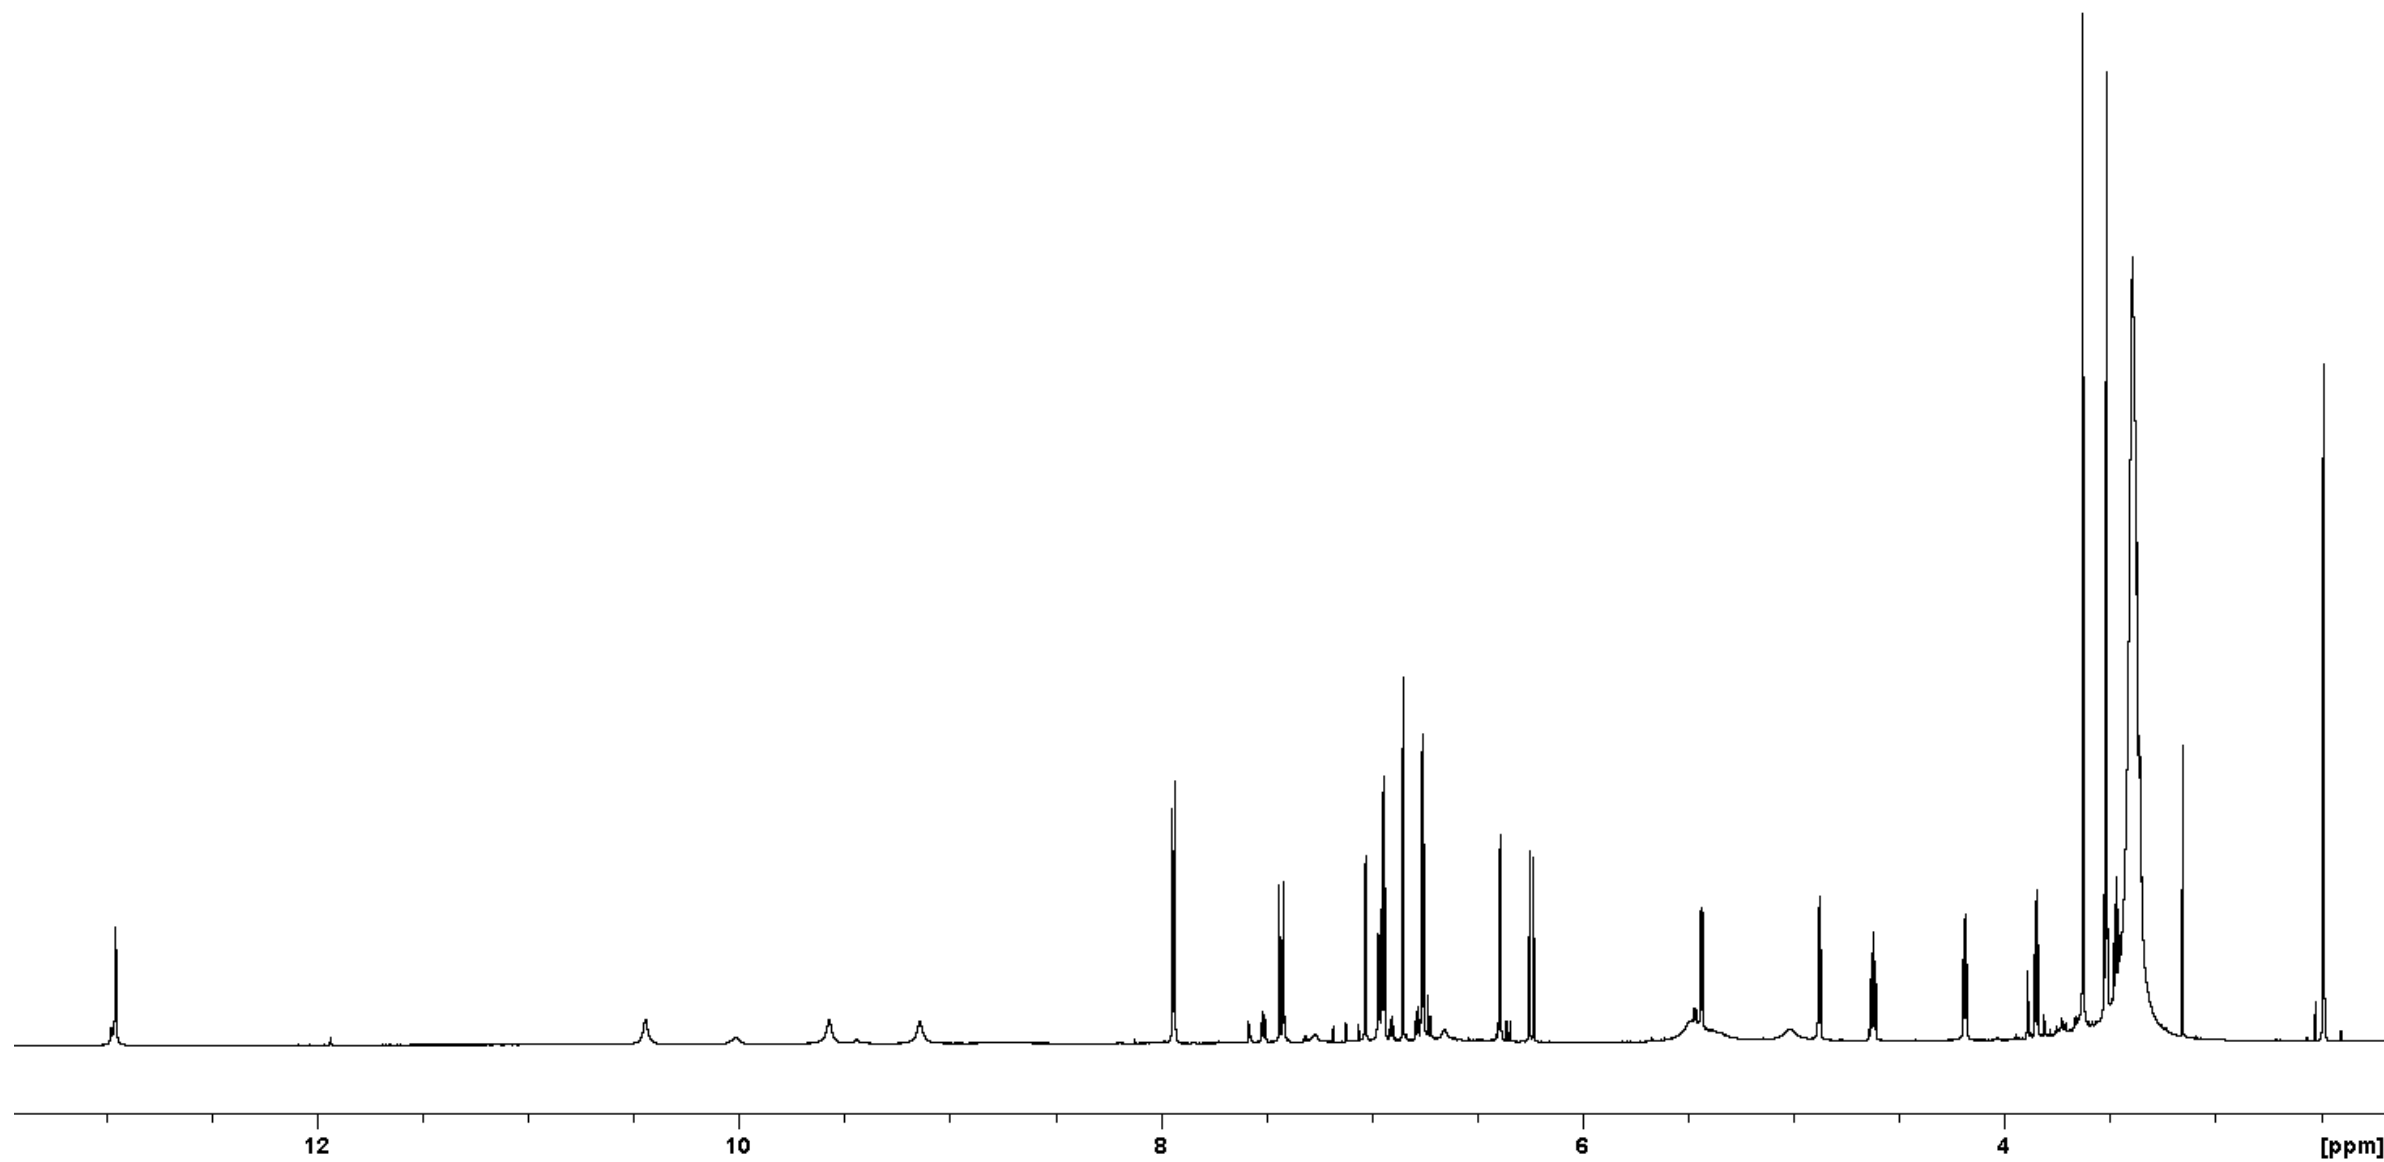

**Figure S2.** 1D  $^{13}\text{C}$  CAPT NMR spectrum of apigenin 7-*O*-(2''-*O*-(2'''-(*E*-caffeoyl)- $\beta$ -glucuronopyranosyl)- $\beta$ -glucuronopyranoside) (**1**)

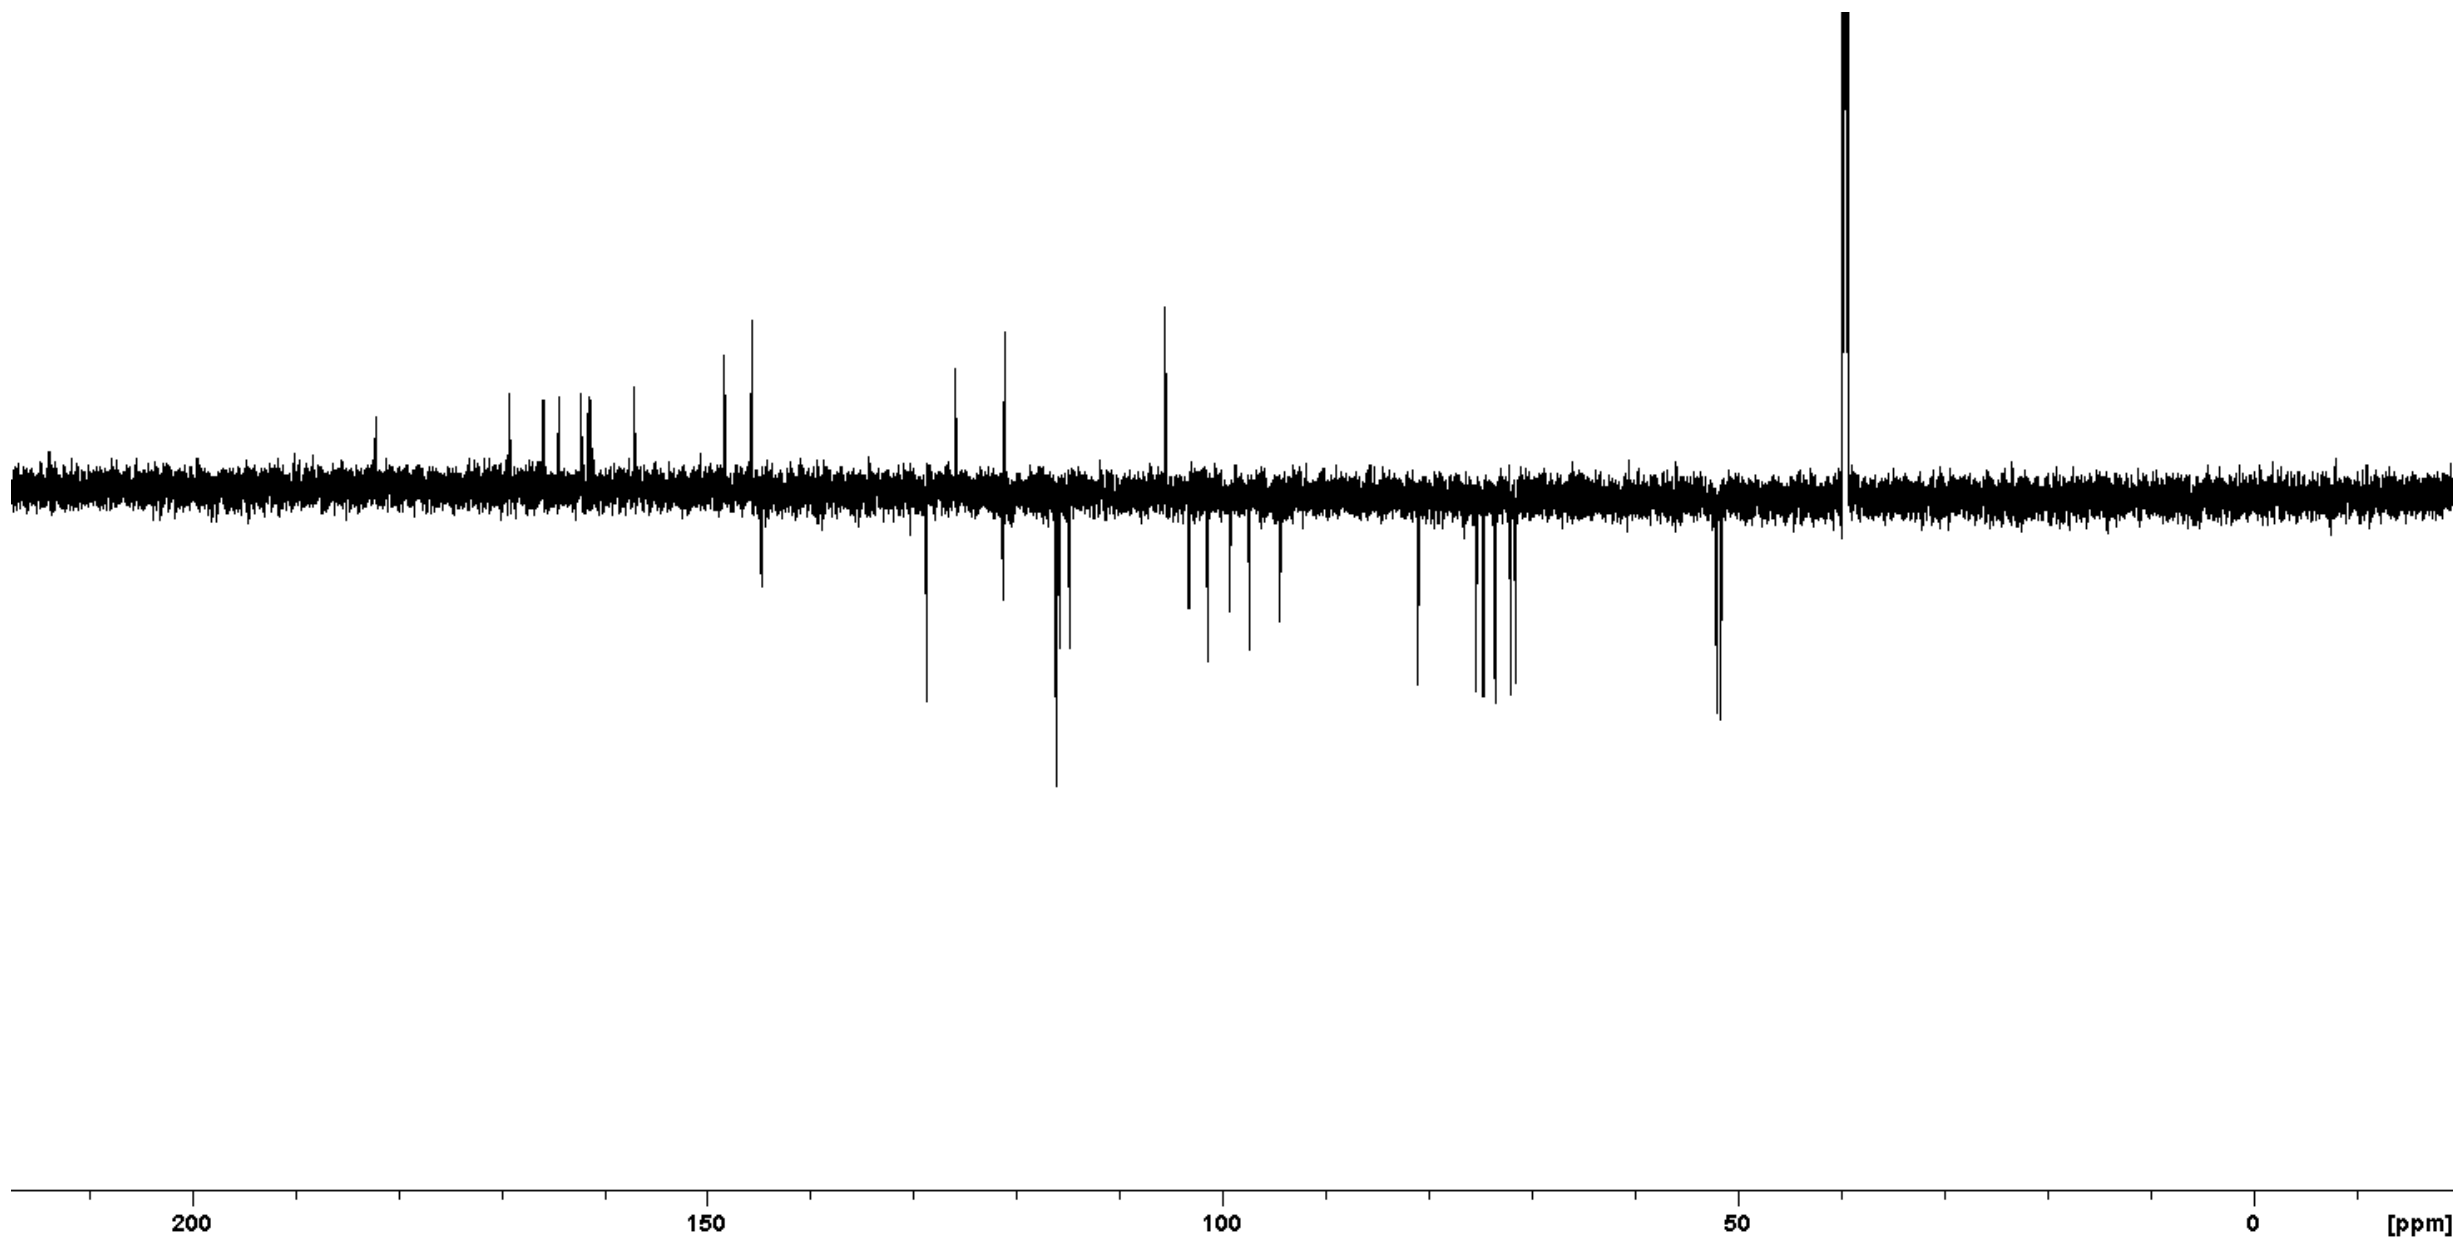

**Figure S3.** 2D  $^1\text{H}$ - $^{13}\text{C}$  edited HSQC NMR spectrum of apigenin 7-*O*-(2''-*O*-(2'''-(*E*-caffeoyl)- $\beta$ -glucuronopyranosyl)- $\beta$ -glucuronopyranoside) (**1**)

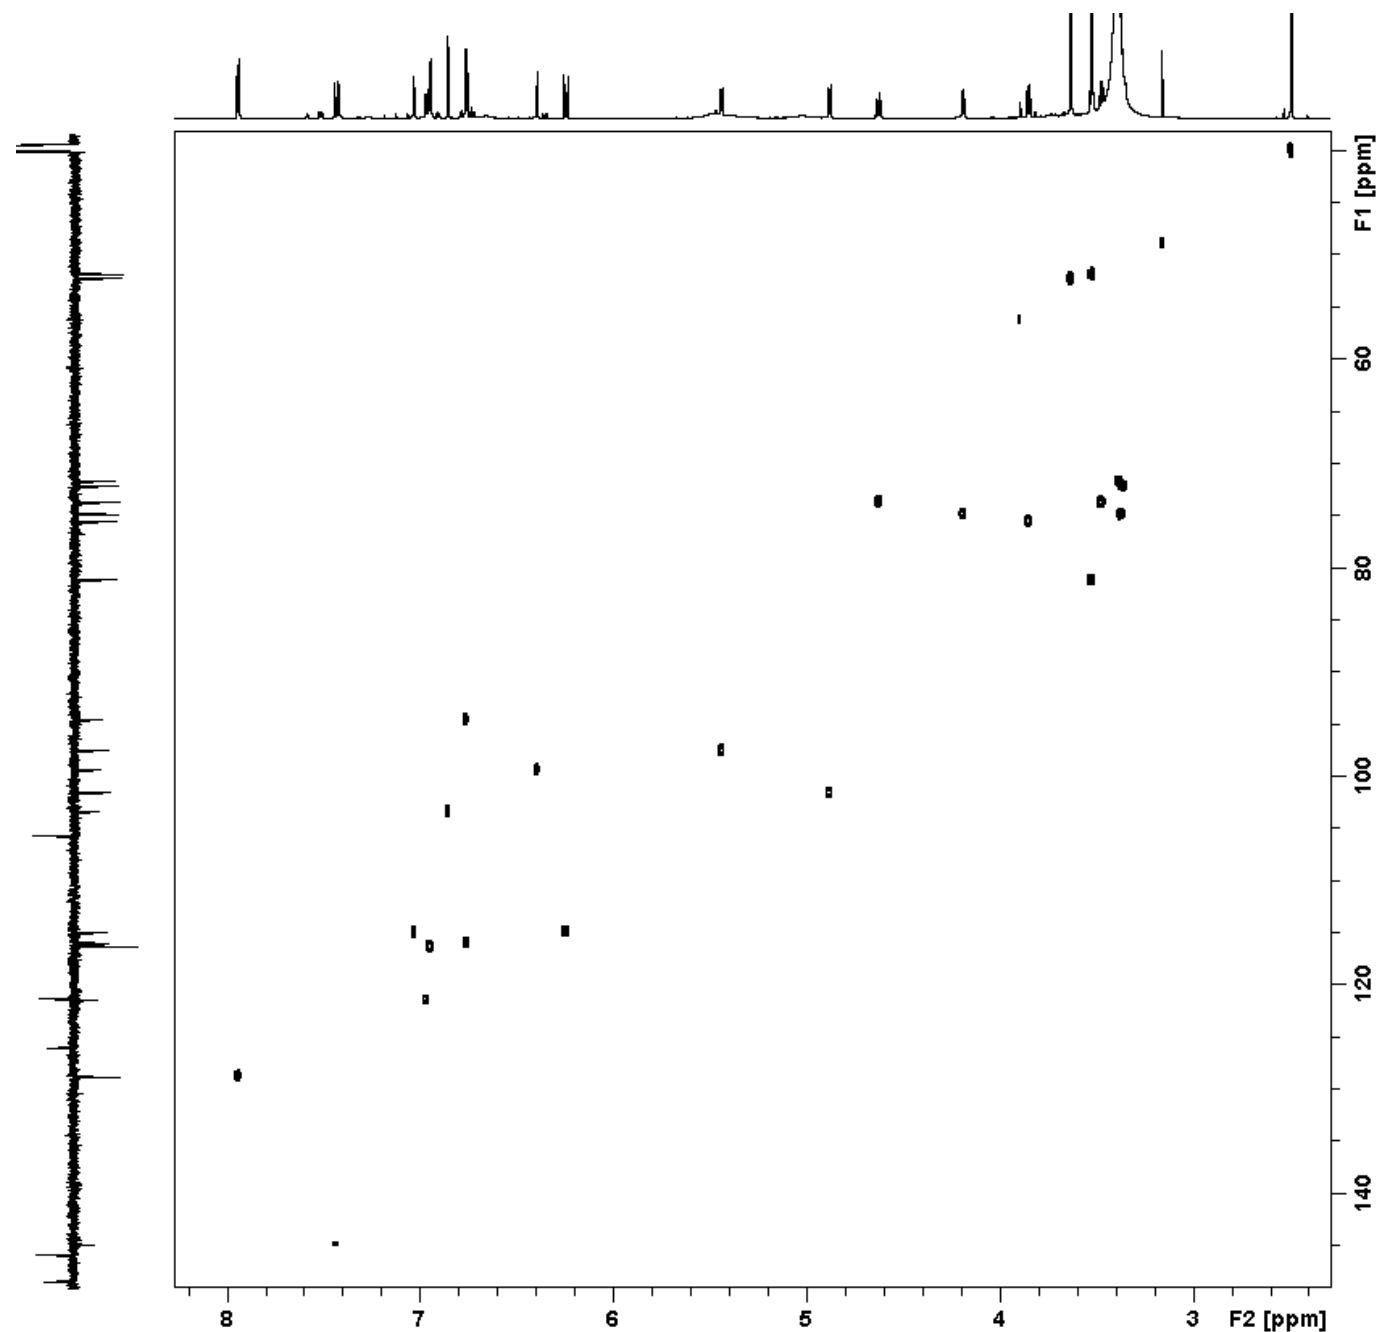

**Figure S4.** 2D  $^1\text{H}$ - $^{13}\text{C}$  HMBC NMR spectrum of apigenin 7-*O*-(2''-*O*-(2'''-(*E*-caffeoyl)- $\beta$ -glucuronopyranosyl)- $\beta$ -glucuronopyranoside) (**1**)

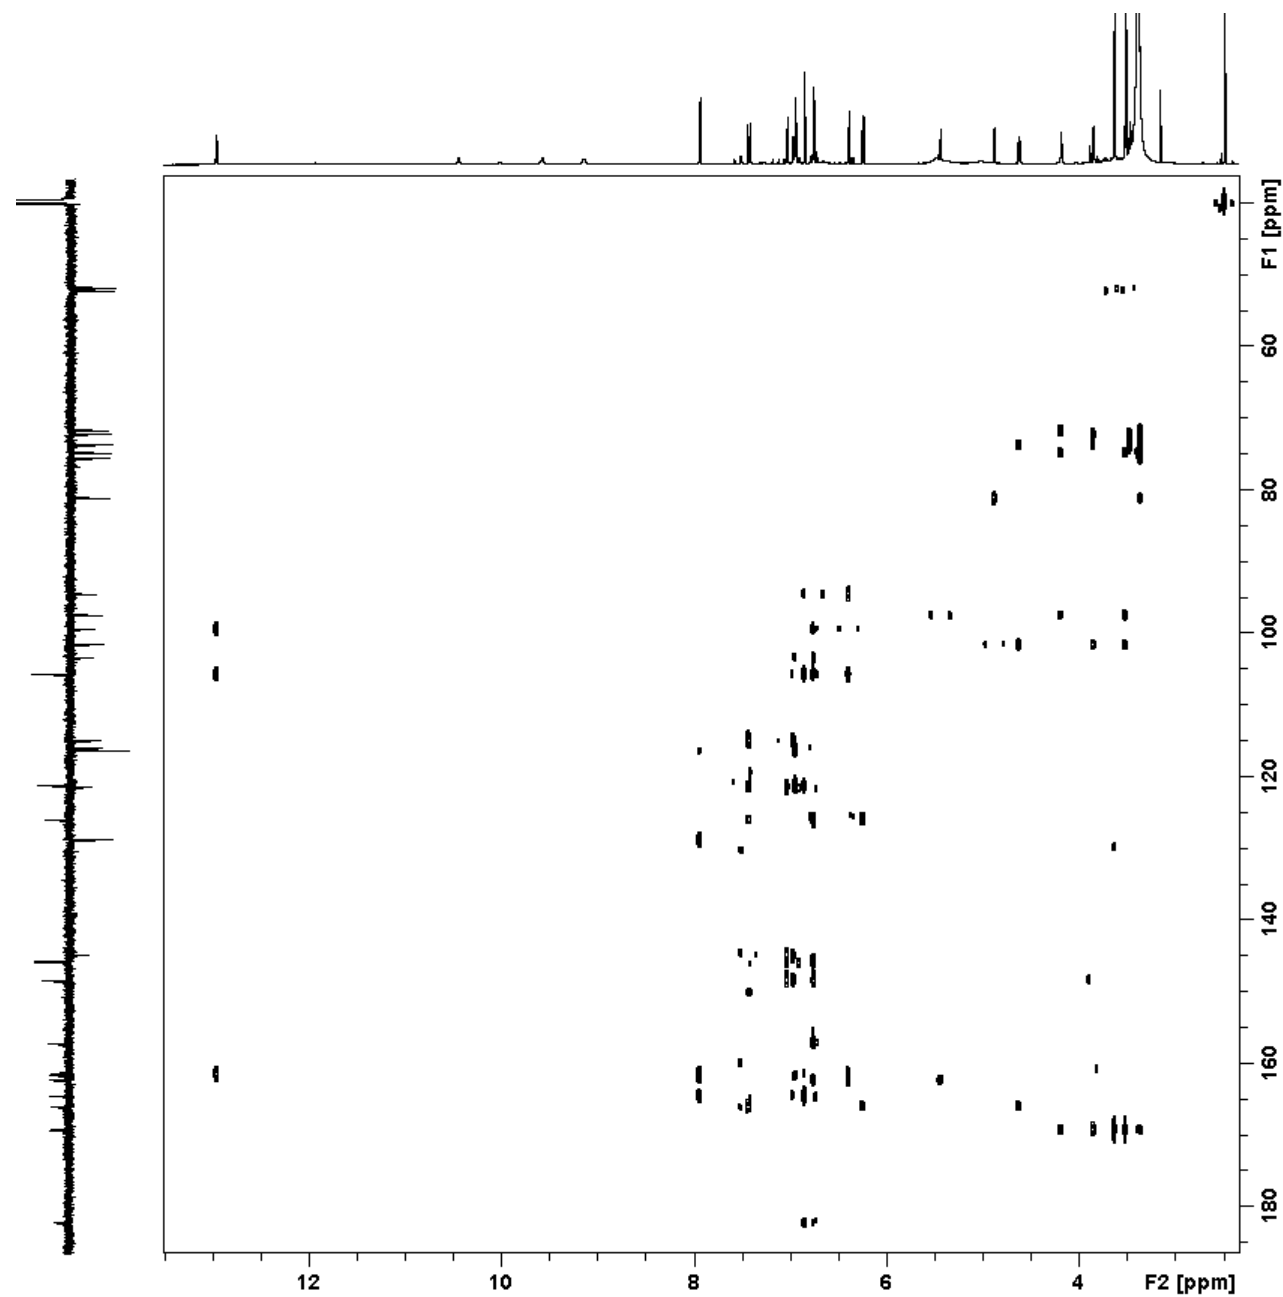

**Figure S5.** 2D  $^1\text{H}$ - $^{13}\text{C}$  HSQC-TOCSY NMR spectrum of apigenin 7-*O*-(2''-*O*-(2'''-(*E*-caffeoyl)- $\beta$ -glucuronopyranosyl)- $\beta$ -glucuronopyranoside) (**1**)

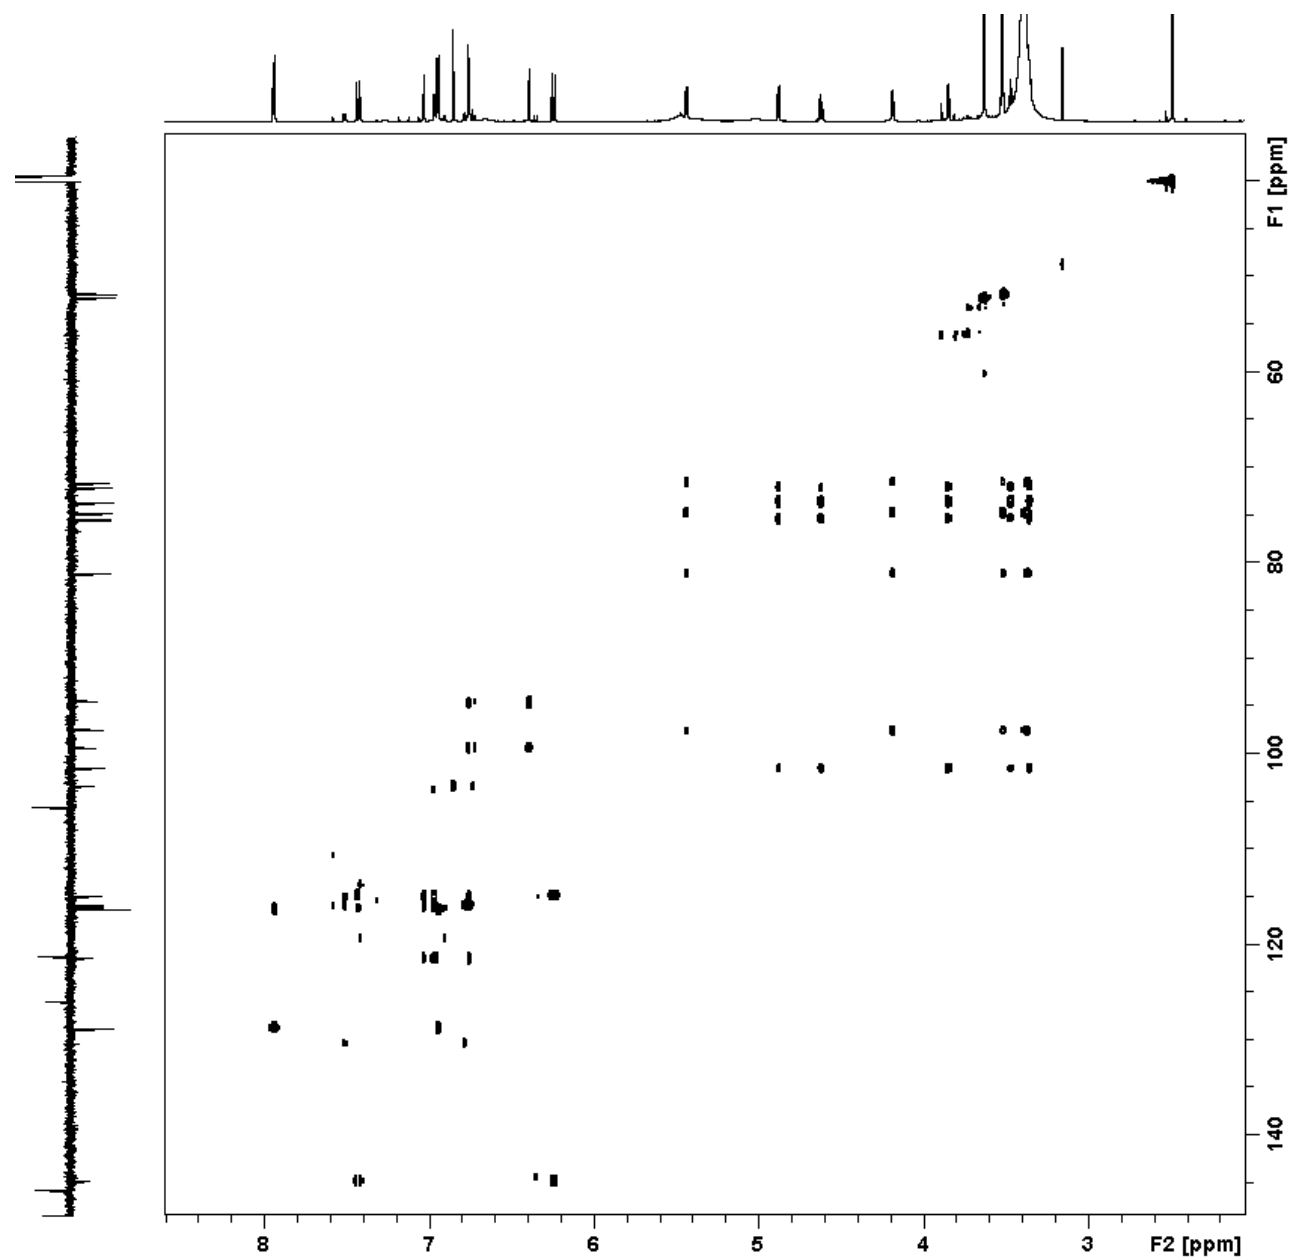

**Figure S6.** 2D  $^1\text{H}$ - $^{13}\text{C}$  H2BC NMR spectrum of apigenin 7-*O*-(2''-*O*-(2'''-(*E*-caffeoyl)- $\beta$ -glucuronopyranosyl)- $\beta$ -glucuronopyranoside) (**1**)

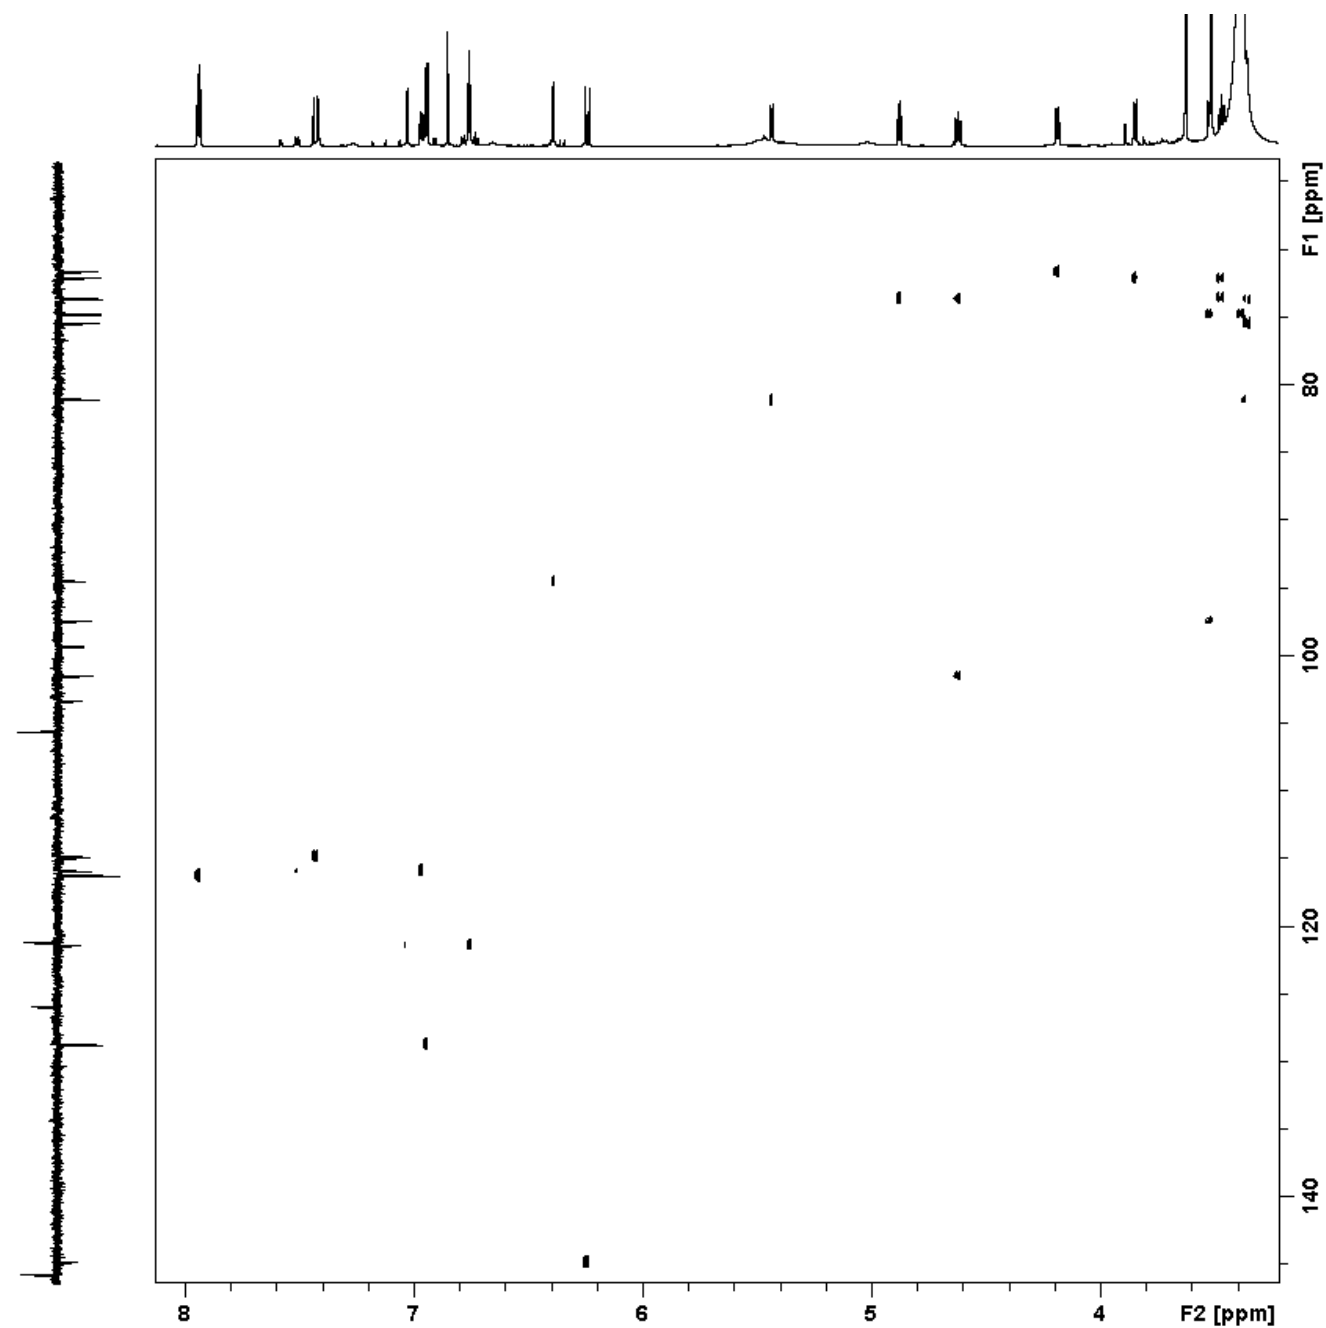



**Figure S7.** 2D  $^1\text{H}$ - $^1\text{H}$  COSY NMR spectrum of apigenin 7-*O*-(2''-*O*-(2'''-(*E*-caffeoyl)- $\beta$ -glucuronopyranosyl)- $\beta$ -glucuronopyranoside) (**1**)

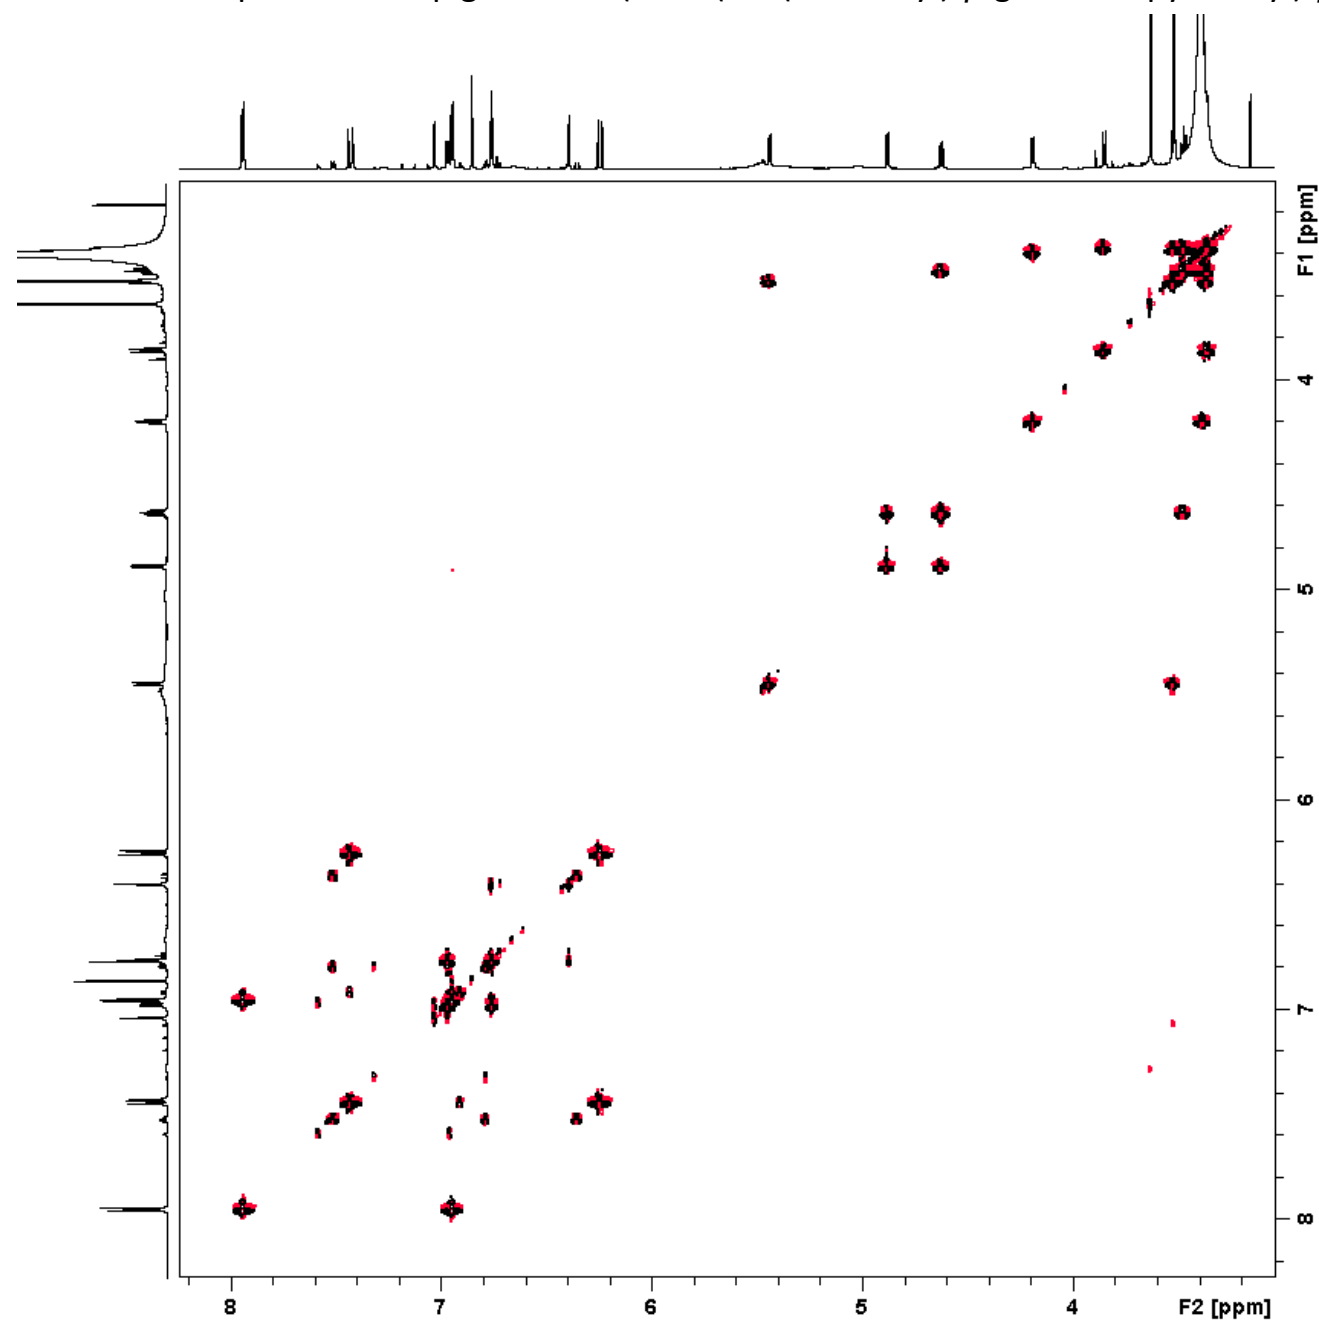

**Figure S8.** 2D  $^1\text{H}$ - $^1\text{H}$  ROESY NMR spectrum of apigenin 7-*O*-(2''-*O*-(2'''-(*E*-caffeoyl)- $\beta$ -glucuronopyranosyl)- $\beta$ -glucuronopyranoside) (**1**)

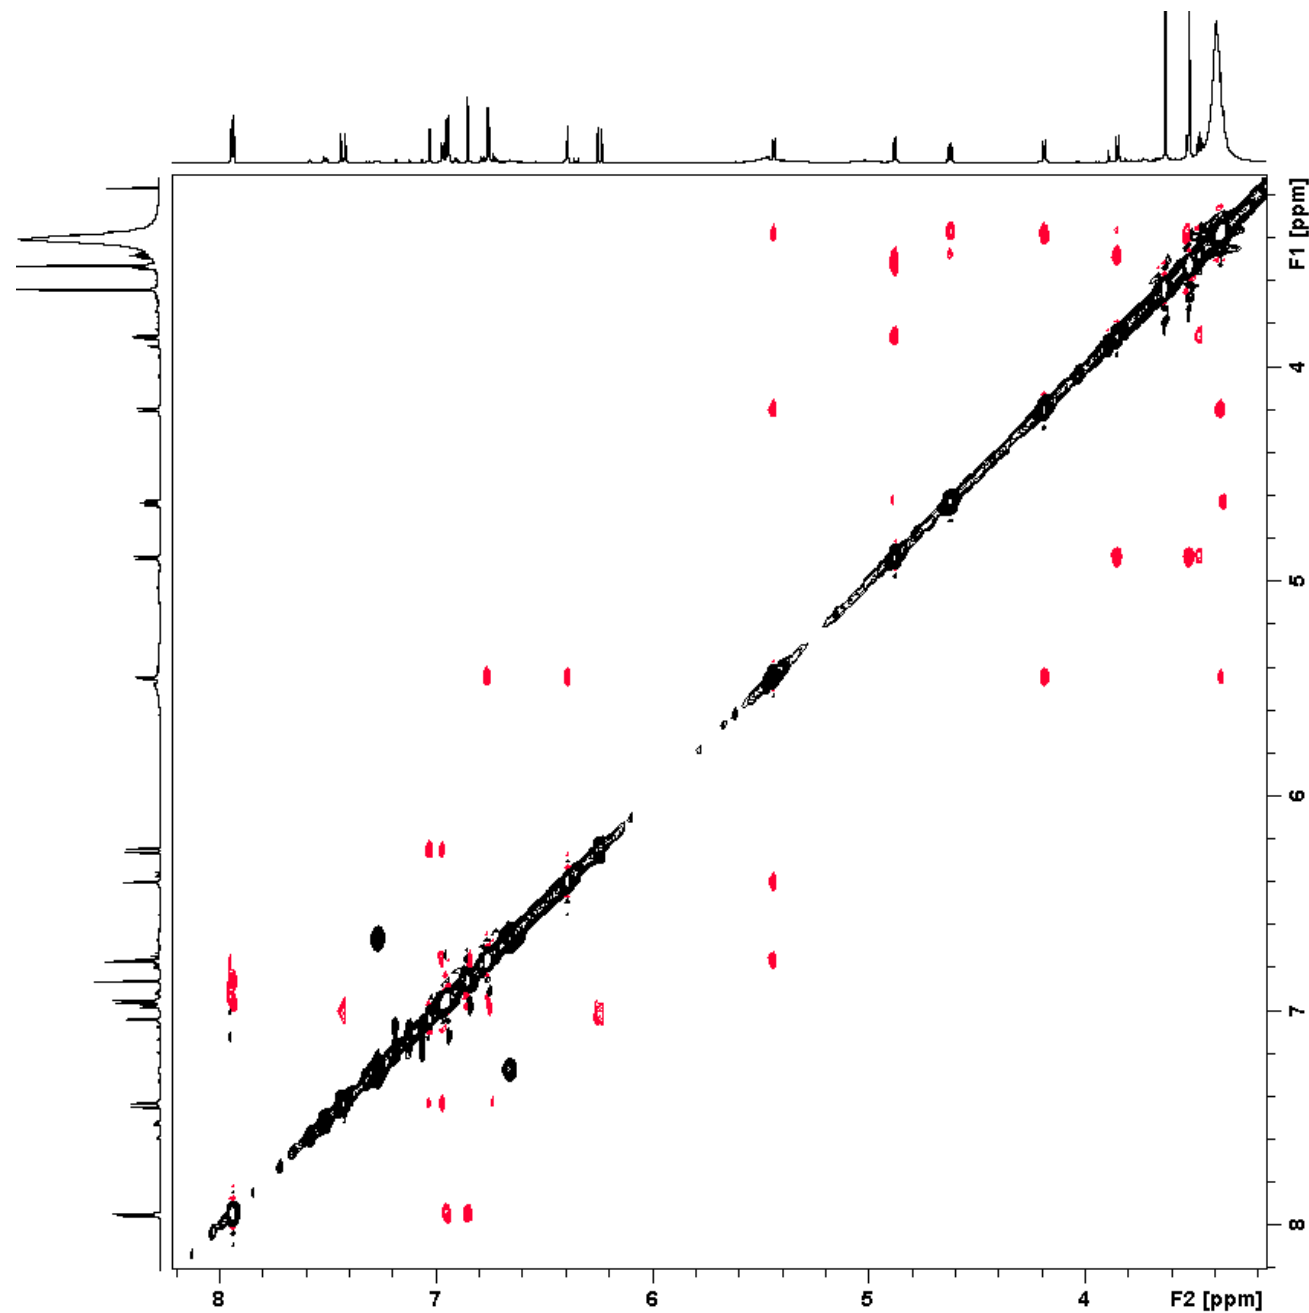

**Figure S9.** HR Mass spectrum of the dimethylester form of apigenin 7-*O*-(2''-*O*-(2'''-(*E*-caffeoyl)-β-glucuronopyranosyl)-β-glucuronopyranoside) (**1**)

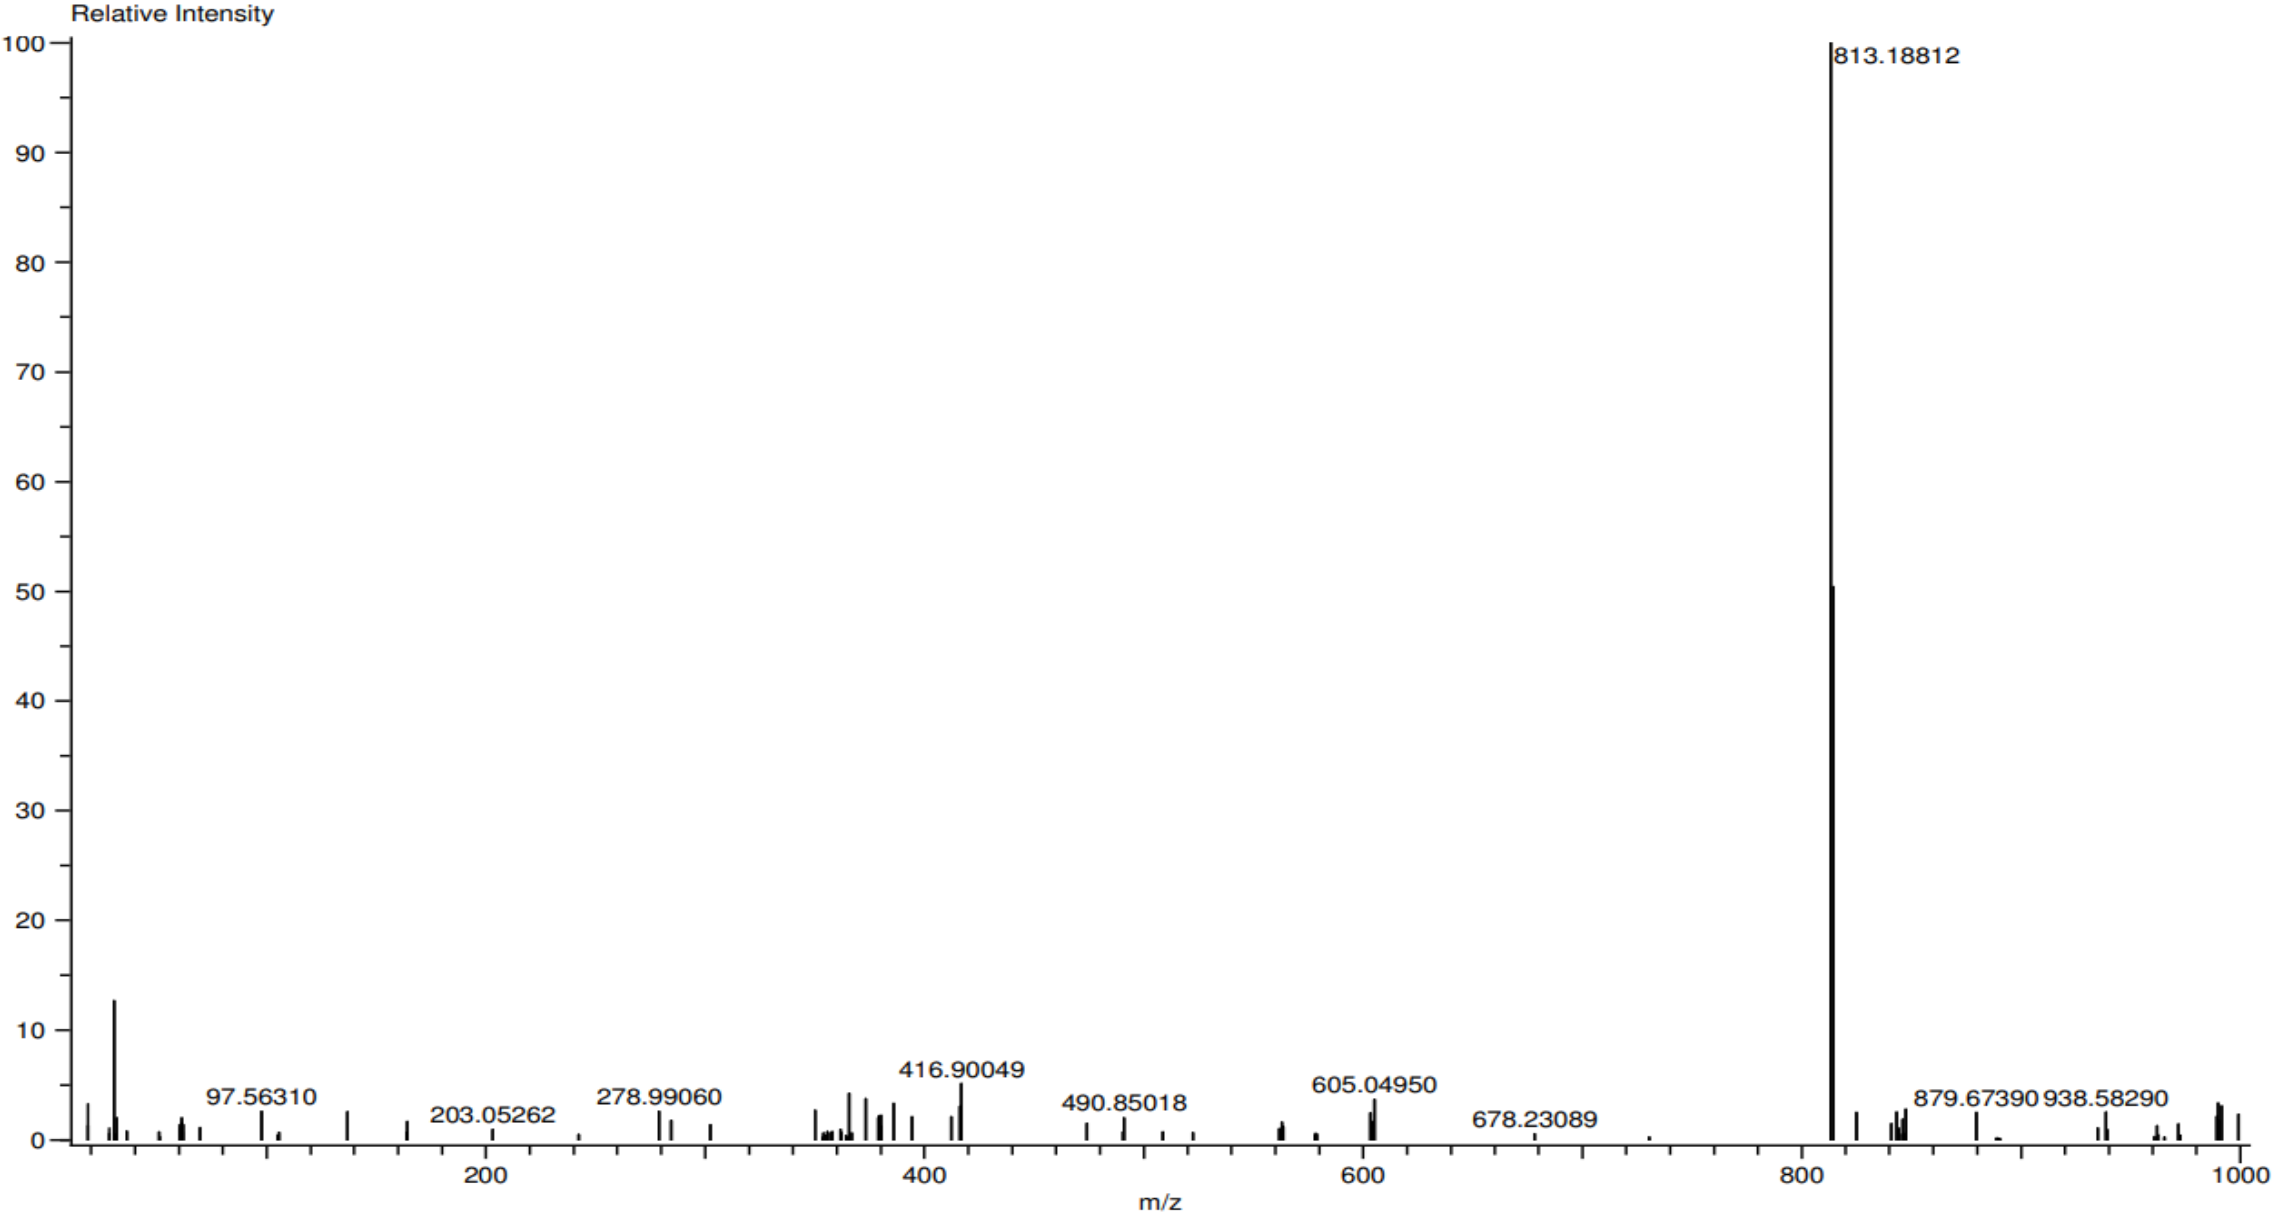

**Figure S10.** Mass spectrum of apigenin 7-*O*-(2''-*O*-(2'''-(*E*-caffeoyl)- $\beta$ -glucuronopyranosyl)- $\beta$ -glucuronopyranoside) (**1**)

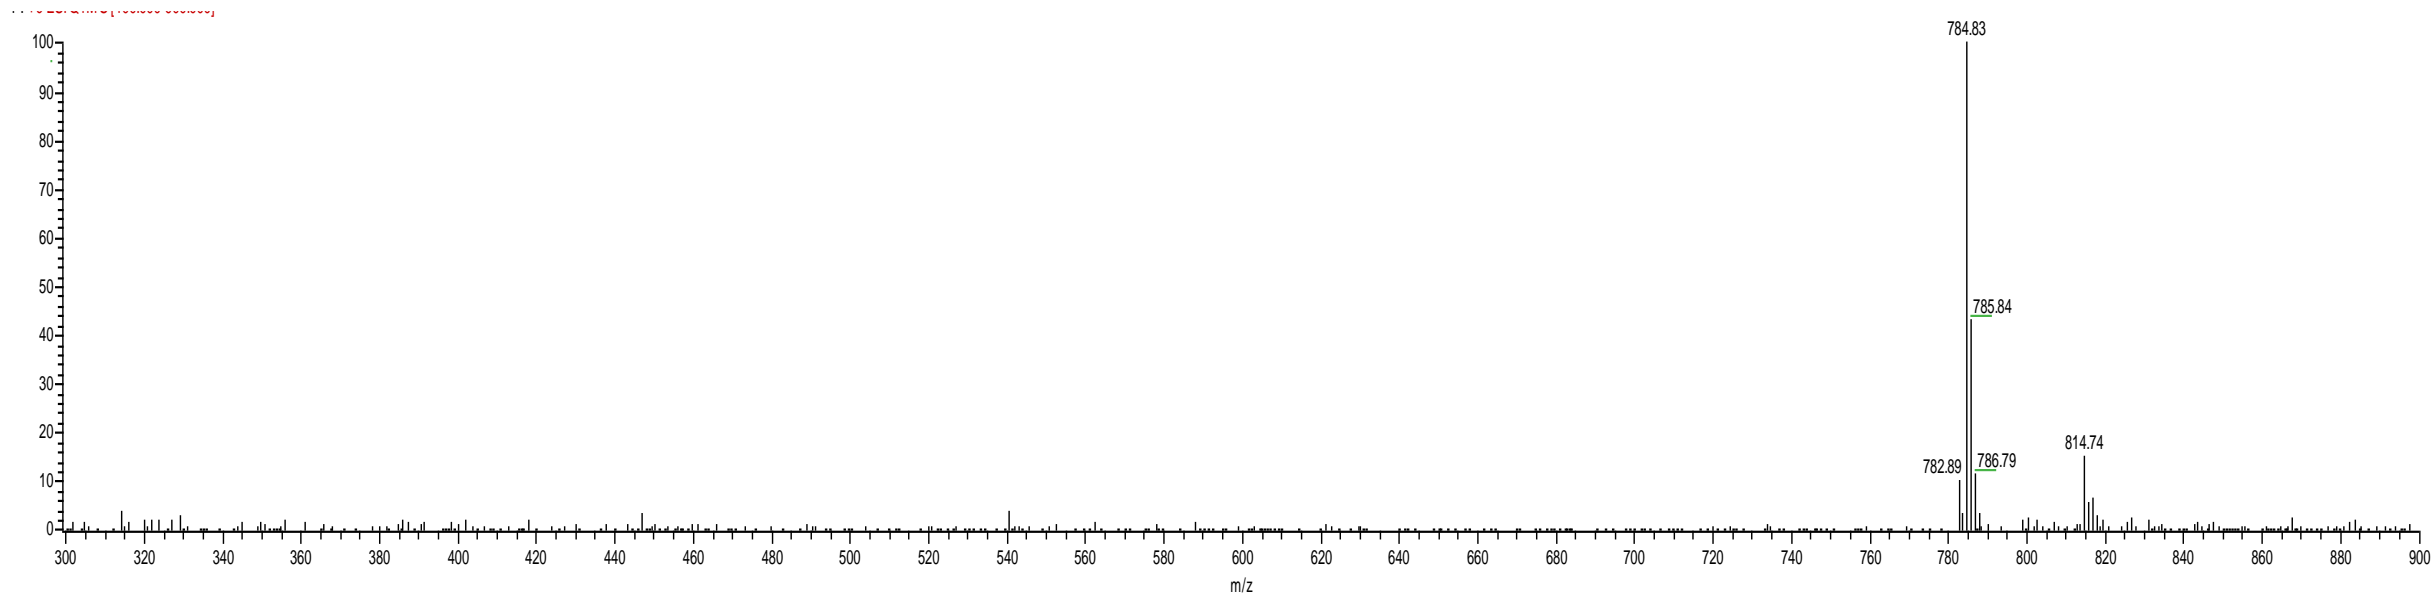

**Figure S11.** 1D  $^1\text{H}$  NMR spectrum of luteolin 7-*O*-(2''-*O*-(2'''-(*E*-caffeoyl)- $\beta$ -glucuronopyranosyl)- $\beta$ -glucuronopyranoside) (**2**)

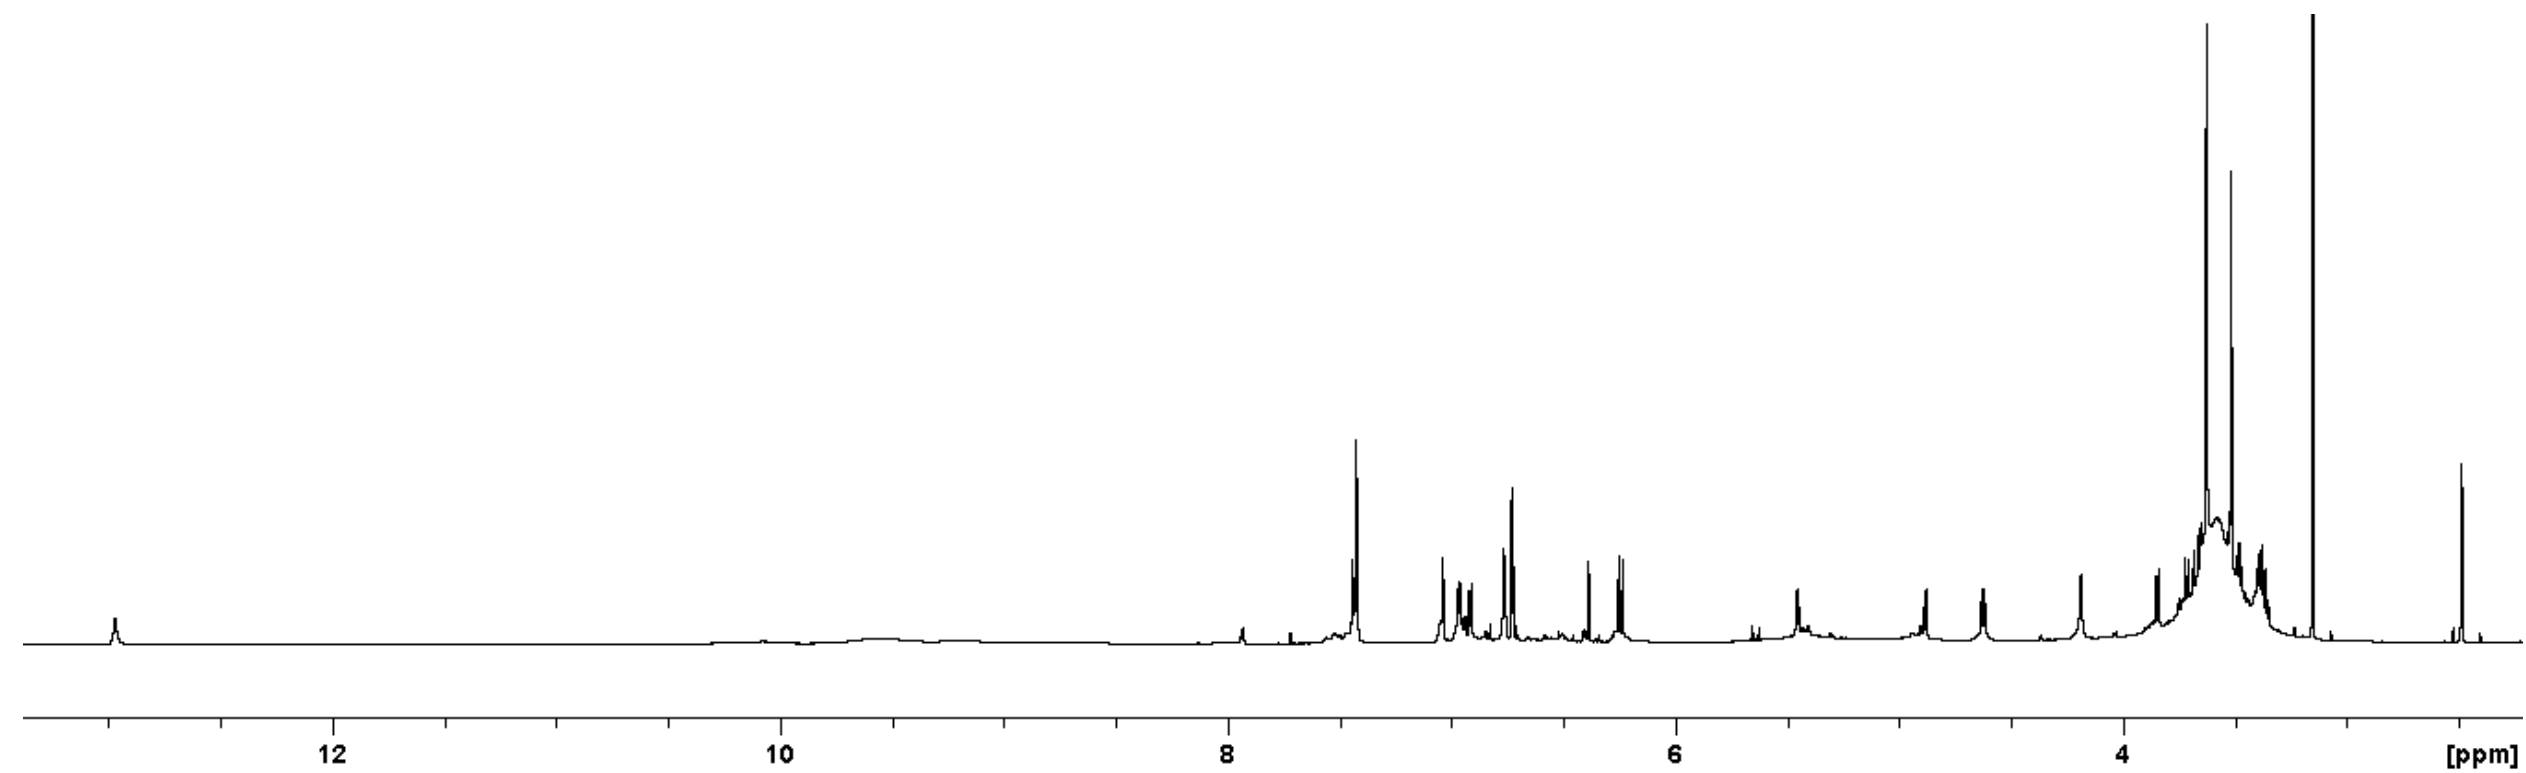

**Figure S12.** 1D  $^{13}\text{C}$  CAPT NMR spectrum of luteolin 7-*O*-(2''-*O*-(2'''-(*E*-caffeoyl)- $\beta$ -glucuronopyranosyl)- $\beta$ -glucuronopyranoside) (**2**)

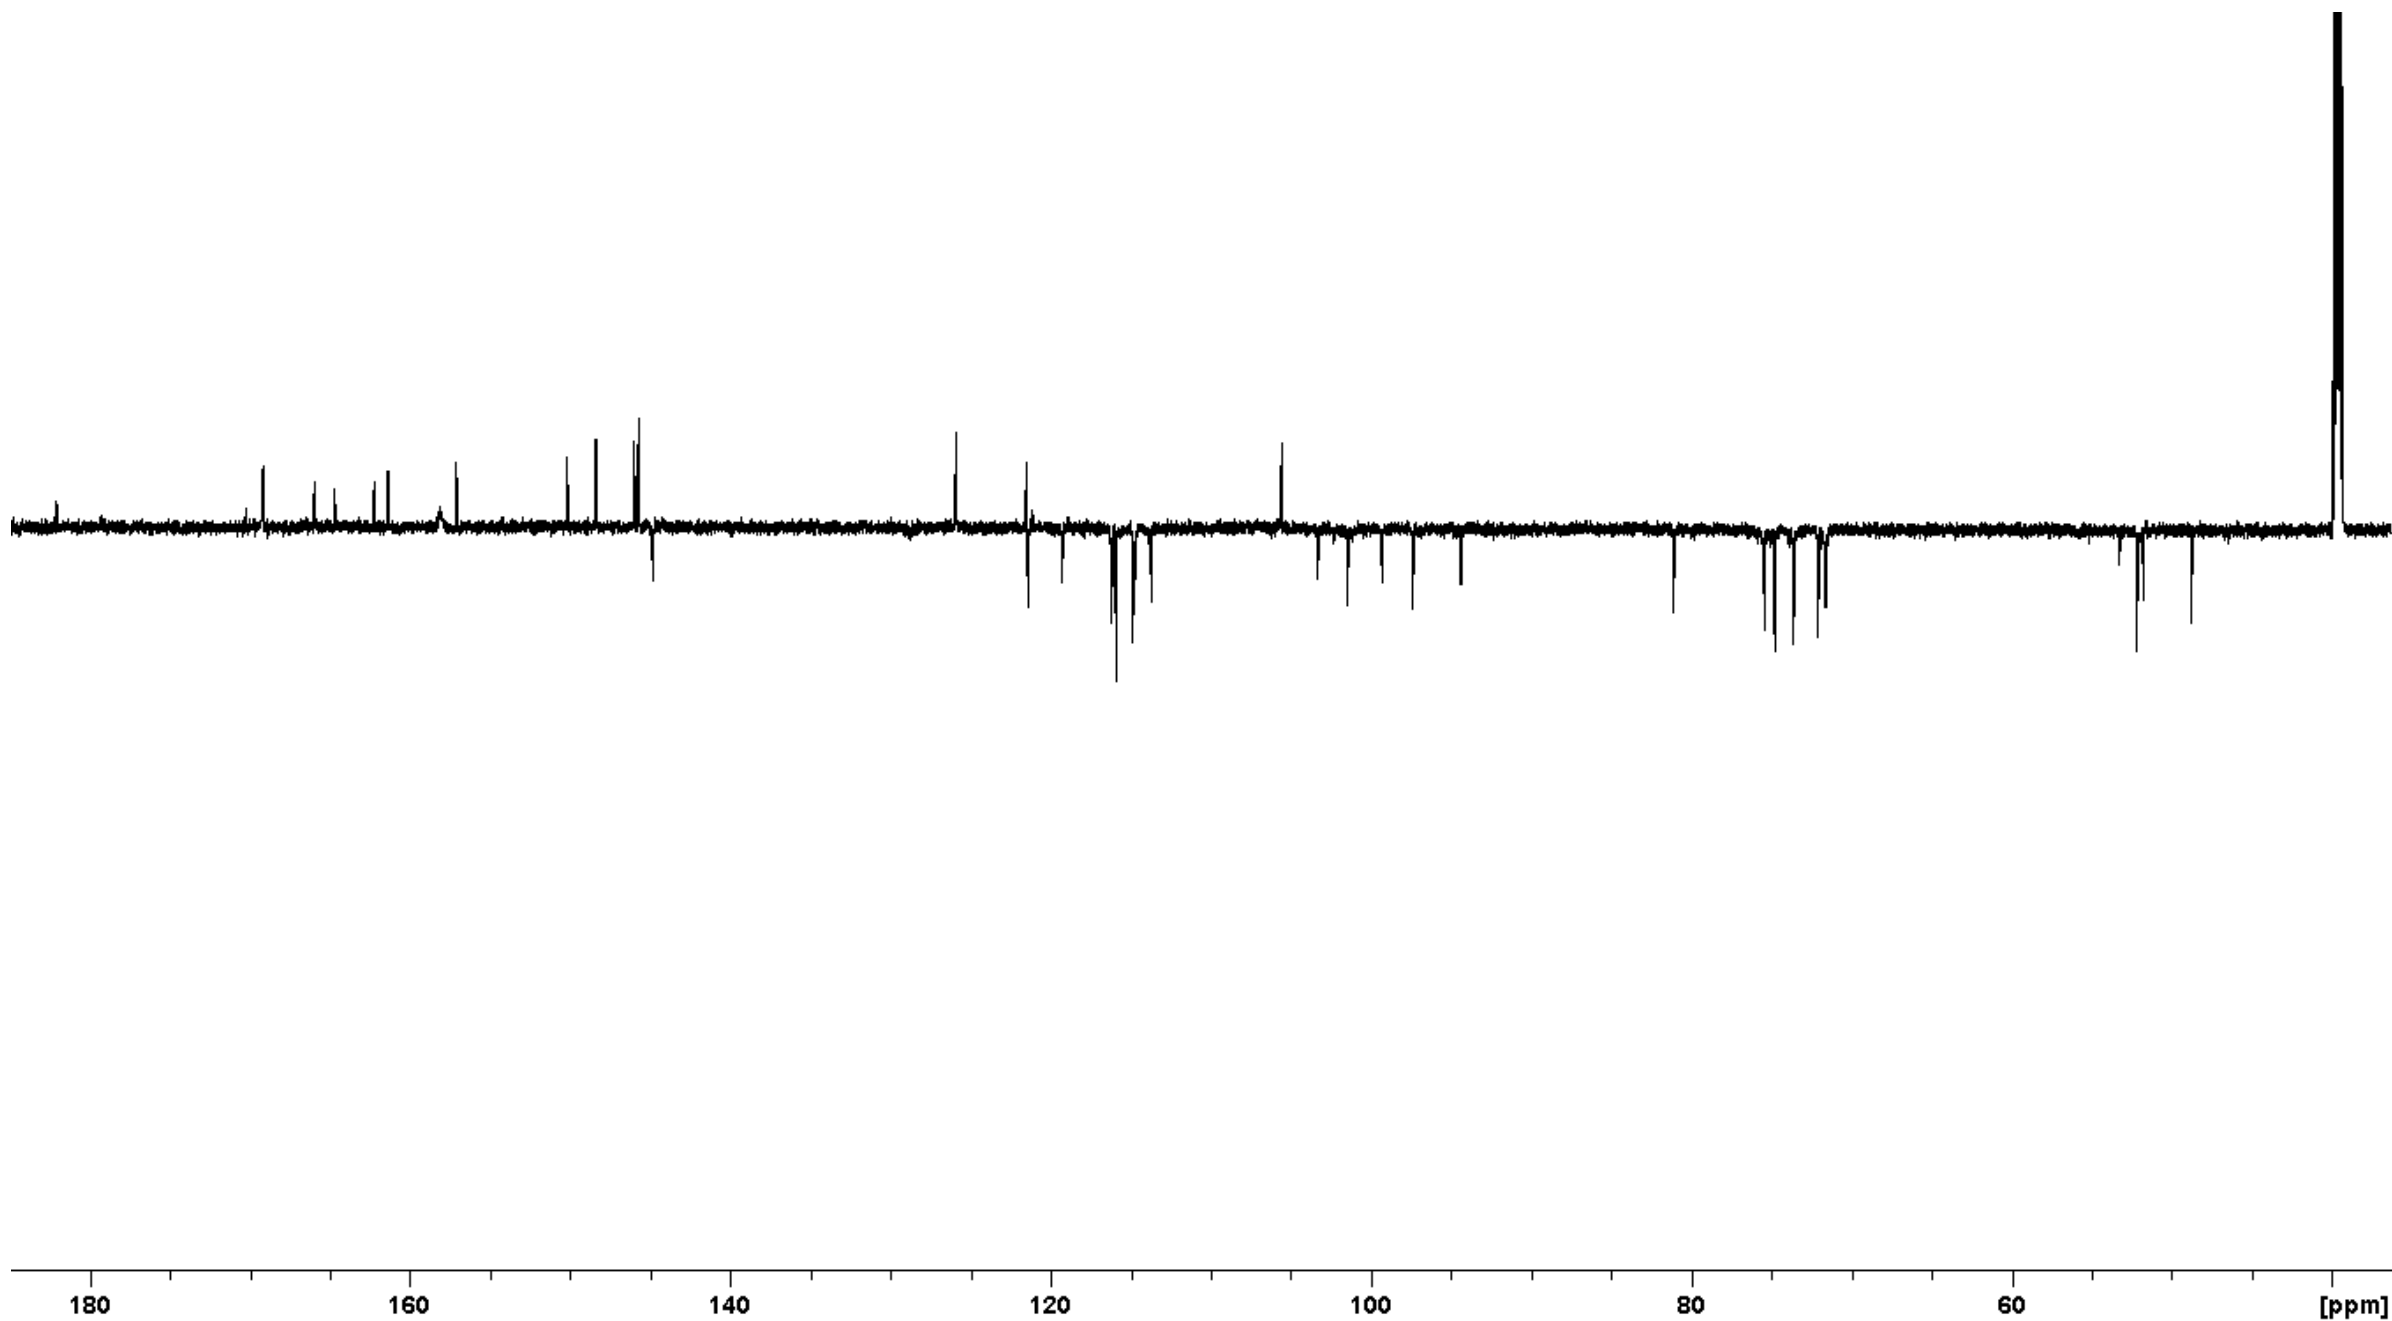

**Figure S13.** 2D  $^1\text{H}$ - $^{13}\text{C}$  HMBC NMR spectrum of luteolin 7-*O*-(2''-*O*-(2'''-(*E*-caffeoyl)- $\beta$ -glucuronopyranosyl)- $\beta$ -glucuronopyranoside) (**2**)

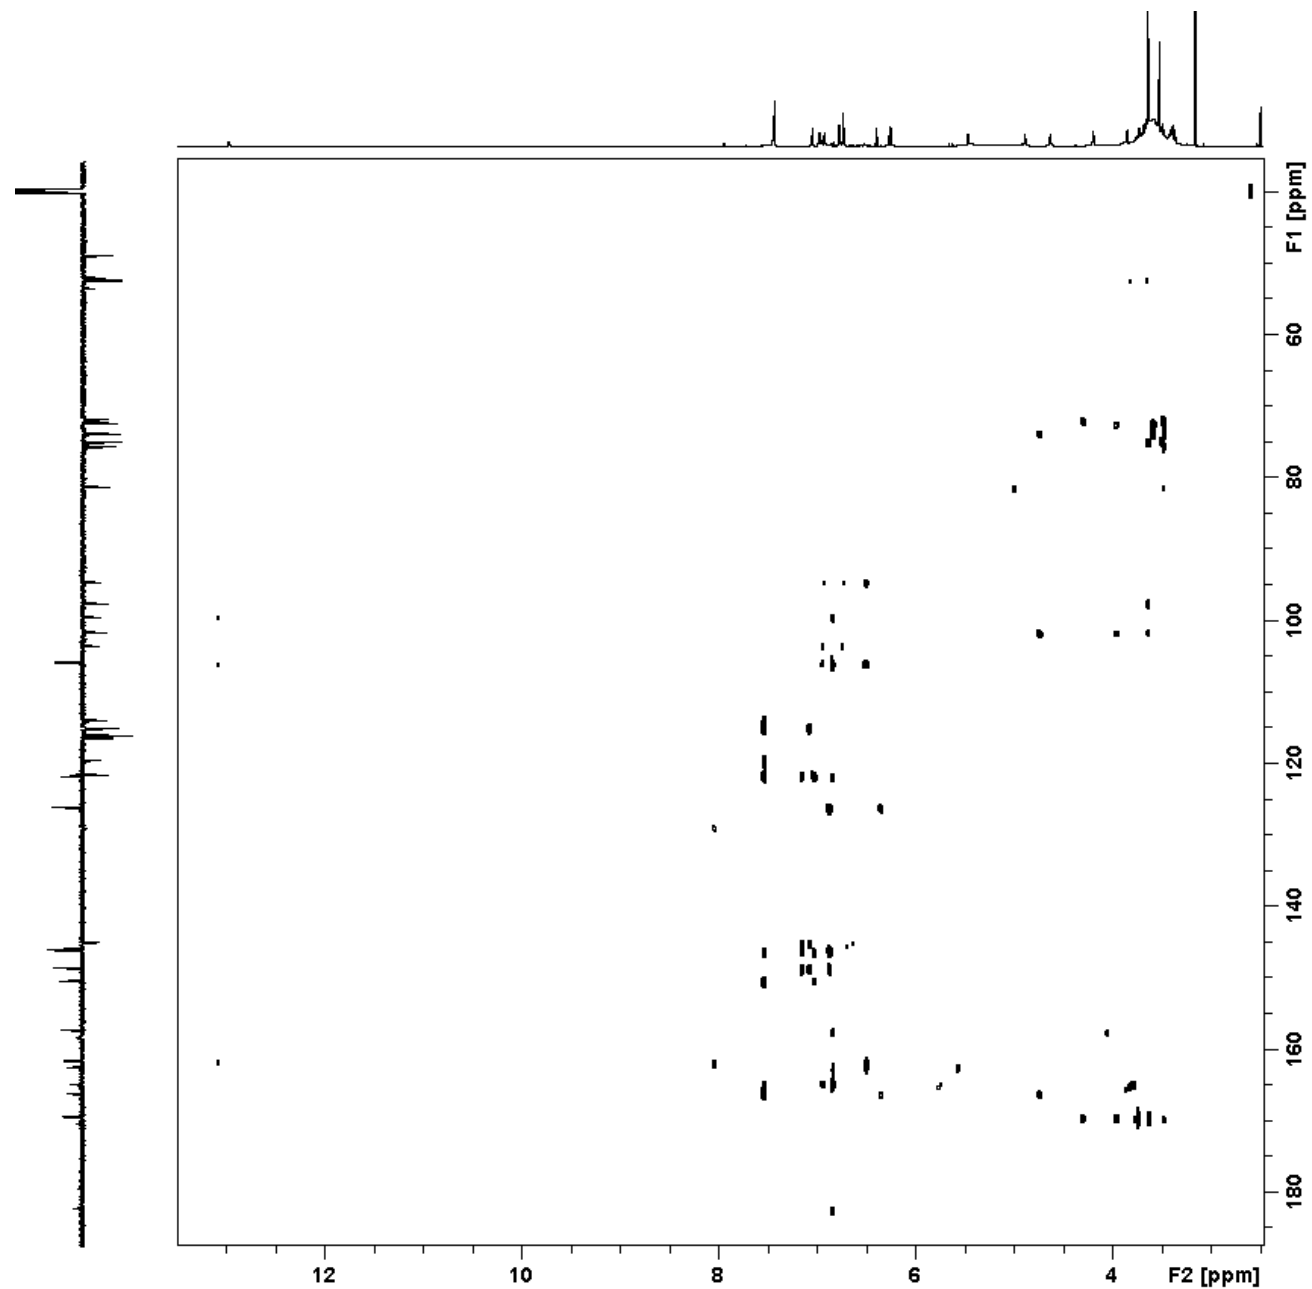

**Figure S14.** 2D  $^1\text{H}$ - $^{13}\text{C}$  edited HSQC NMR spectrum of luteolin 7-*O*-(2''-*O*-(2'''-(*E*-caffeoyl)- $\beta$ -glucuronopyranosyl)- $\beta$ -glucuronopyranoside) (**2**)

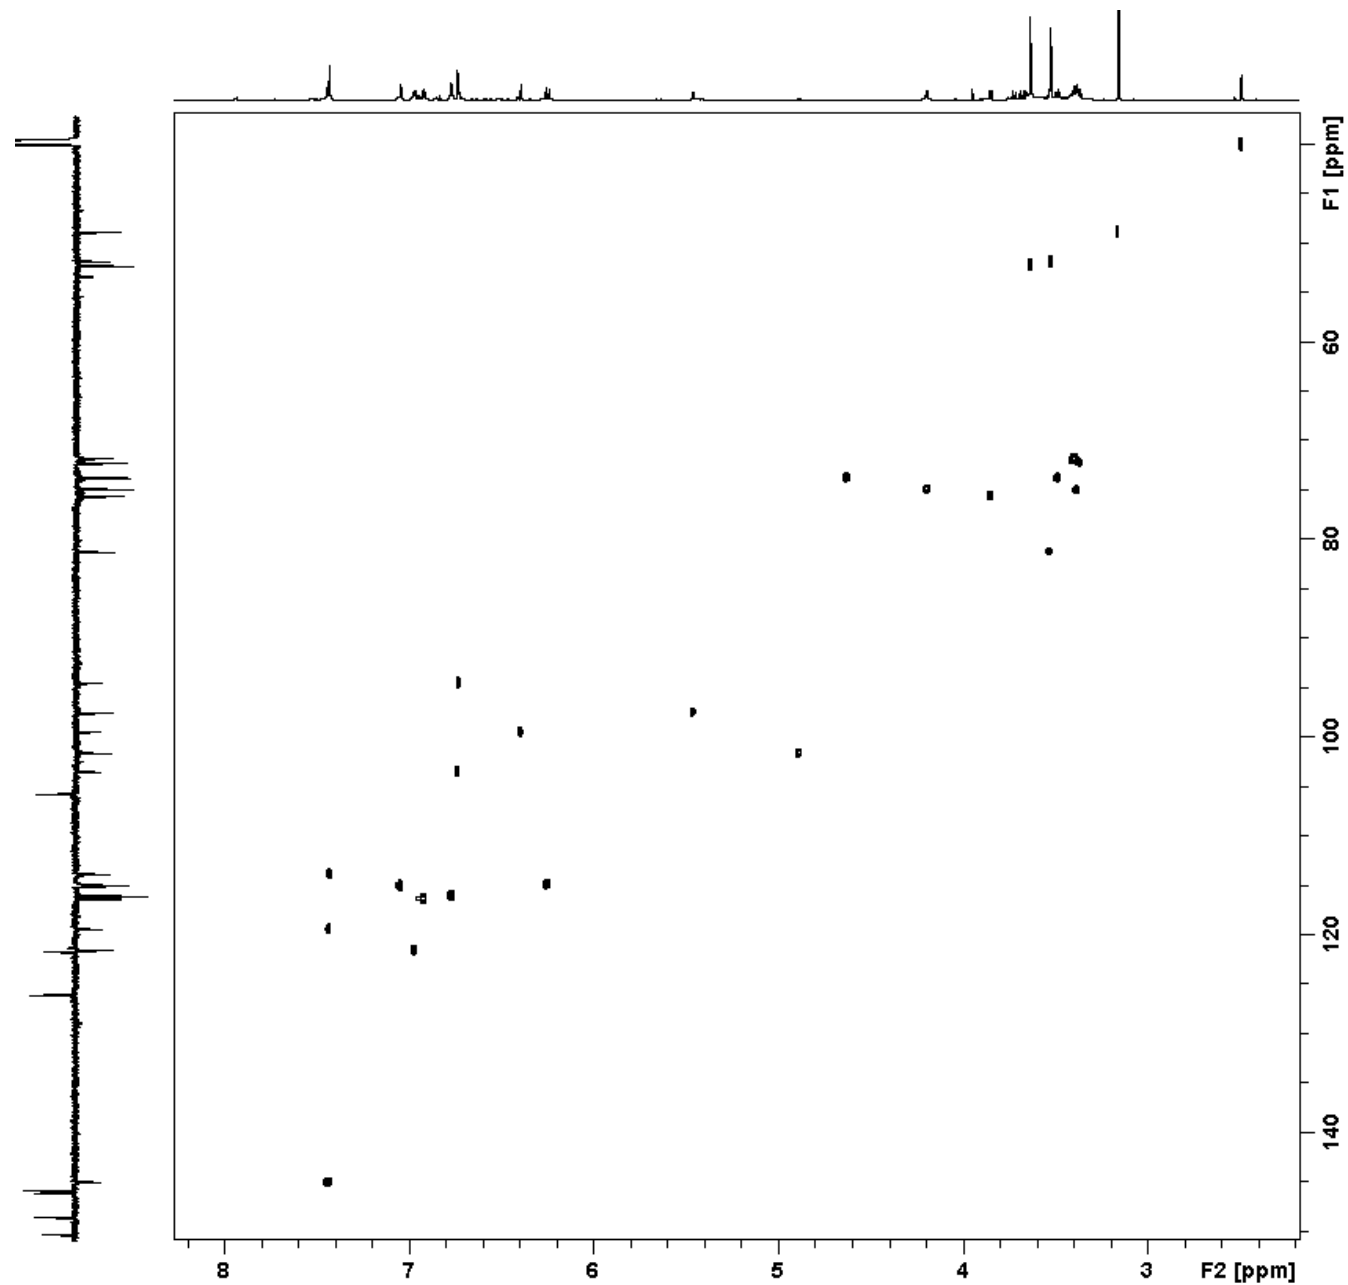



**Figure S15.** 2D  $^1\text{H}$ - $^{13}\text{C}$  H2BC NMR spectrum of luteolin 7-*O*-(2''-*O*-(2'''-(*E*-caffeoyl)- $\beta$ -glucuronopyranosyl)- $\beta$ -glucuronopyranoside) (**2**)

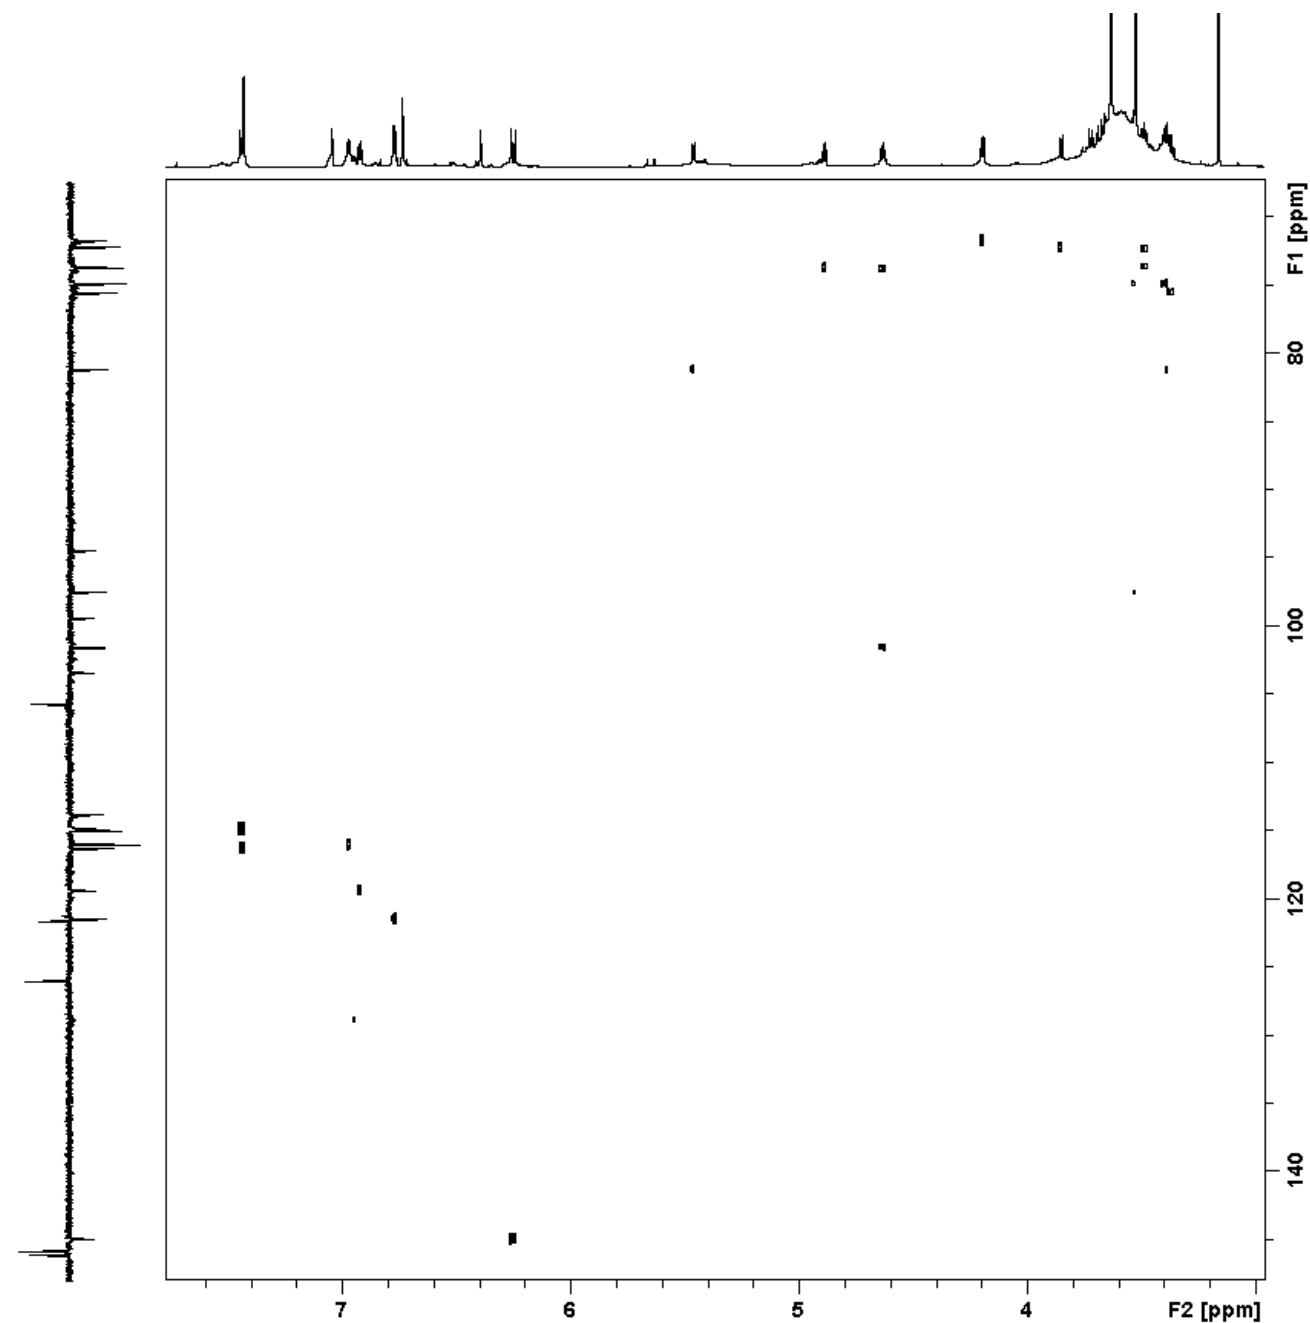

**Figure S16.** 2D  $^1\text{H}$ - $^1\text{H}$  COSY NMR spectrum of luteolin 7-*O*-(2''-*O*-(2'''-(*E*-caffeoyl)- $\beta$ -glucuronopyranosyl)- $\beta$ -glucuronopyranoside) (**2**)

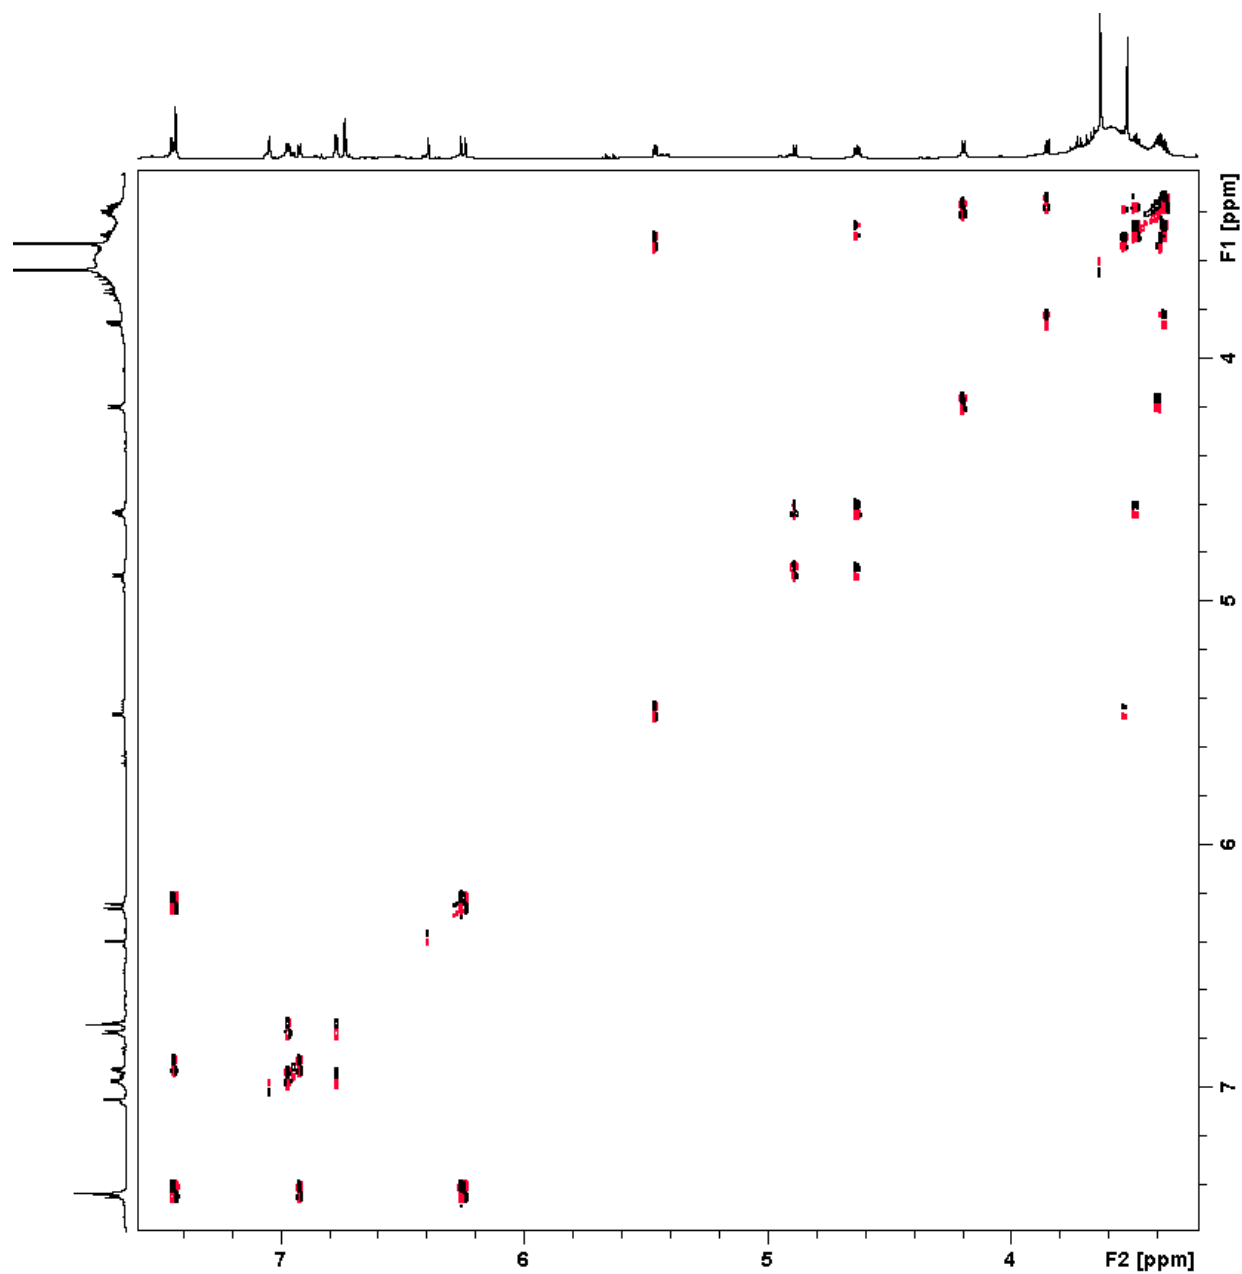

**Figure S17.** HR mass spectrum of the methyl ester form of luteolin 7-*O*-(2''-*O*-(2'''-(*E*-caffeoyl)-β-glucuronopyranosyl)-β-glucuronopyranoside) (**2**)

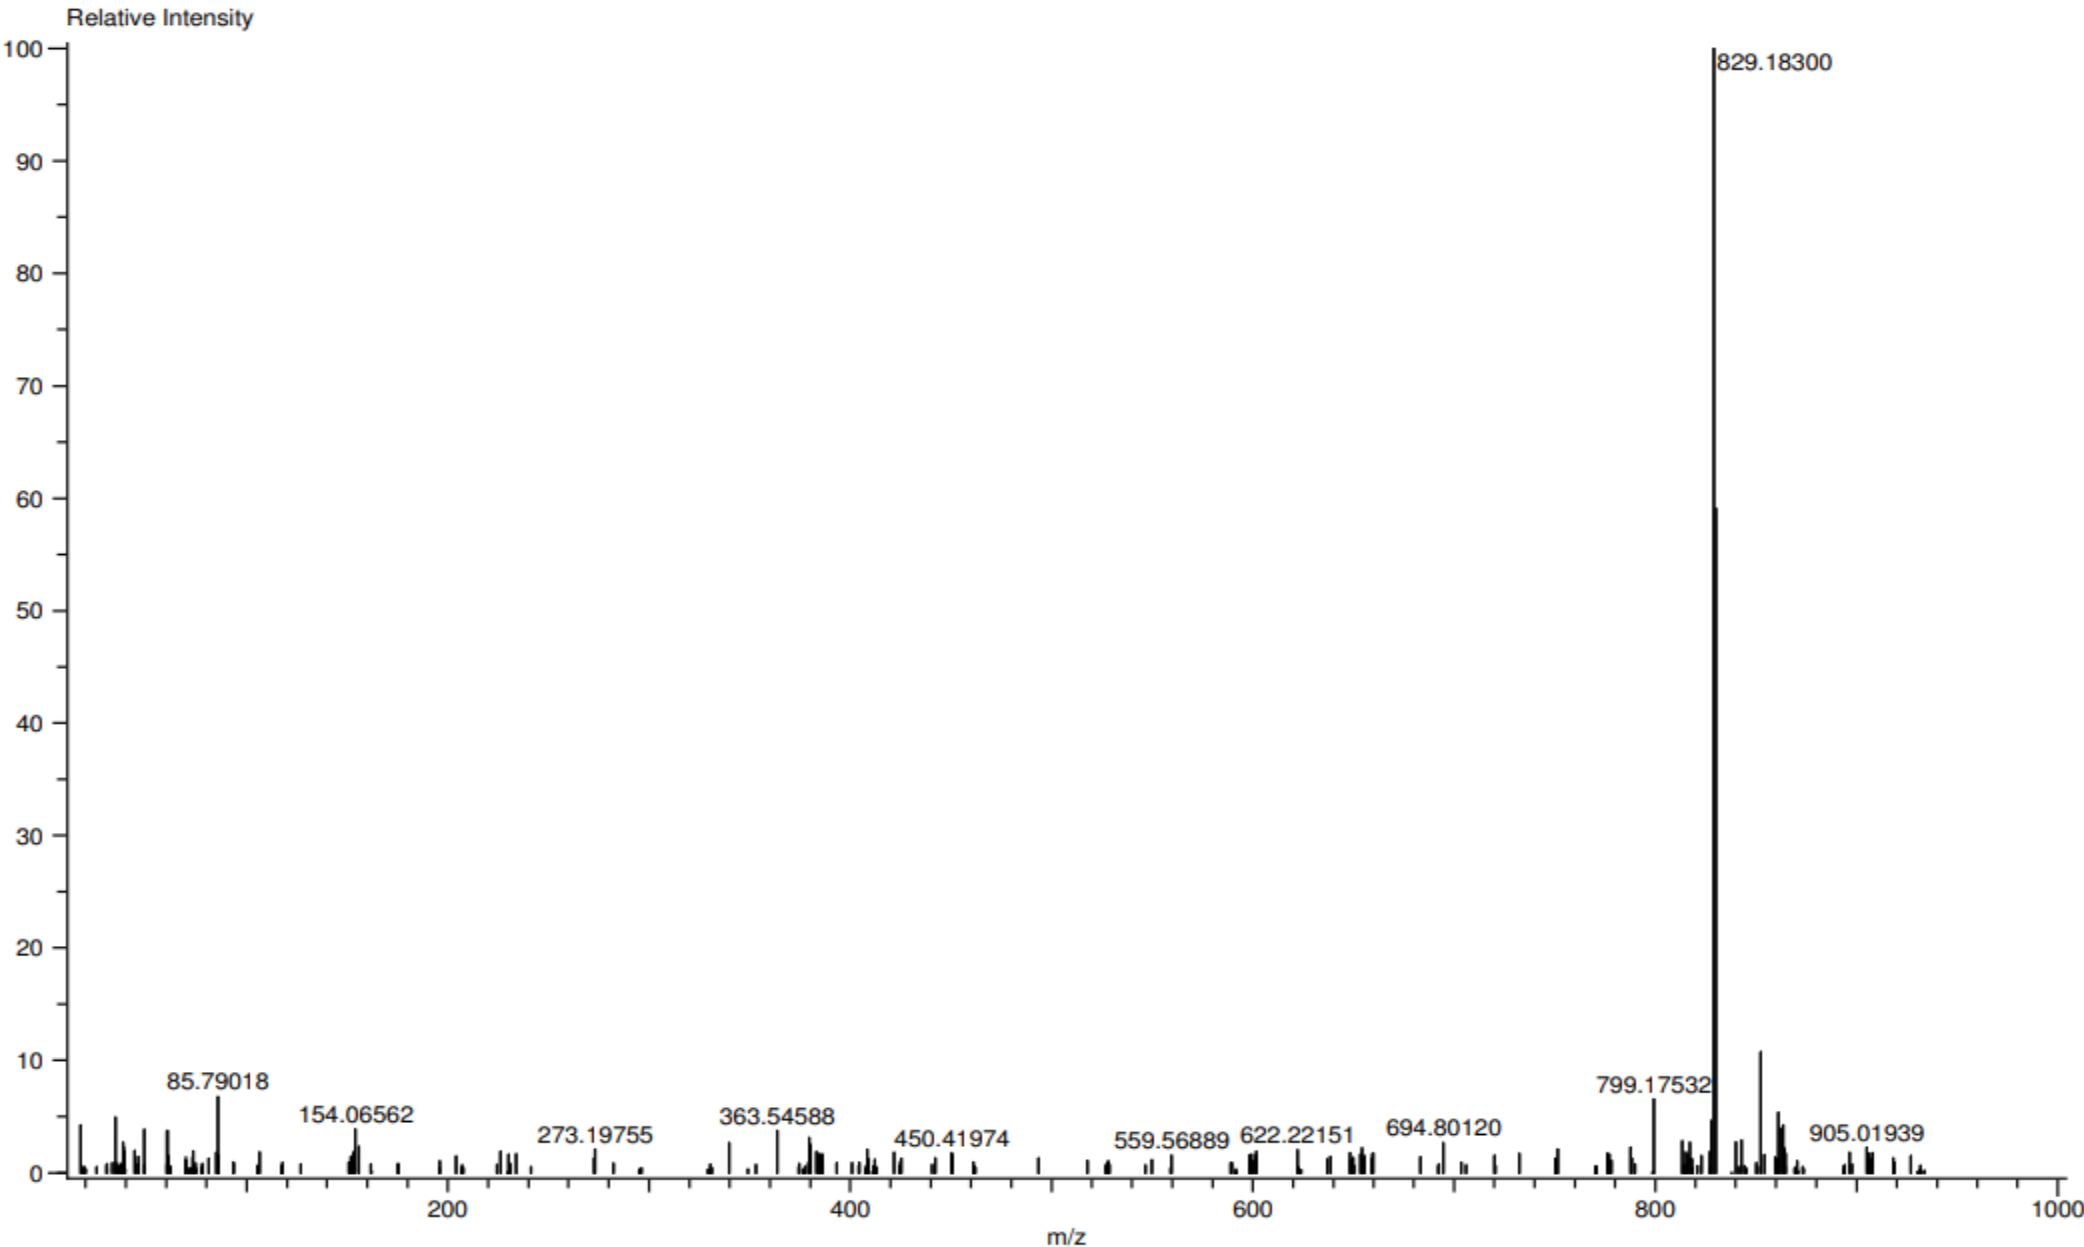

**Figure S18.** Mass spectrum of luteolin 7-*O*-(2''-*O*-(2'''-(*E*-caffeoyl)-β-glucuronopyranosyl)-β-glucuronopyranoside) (**2**)

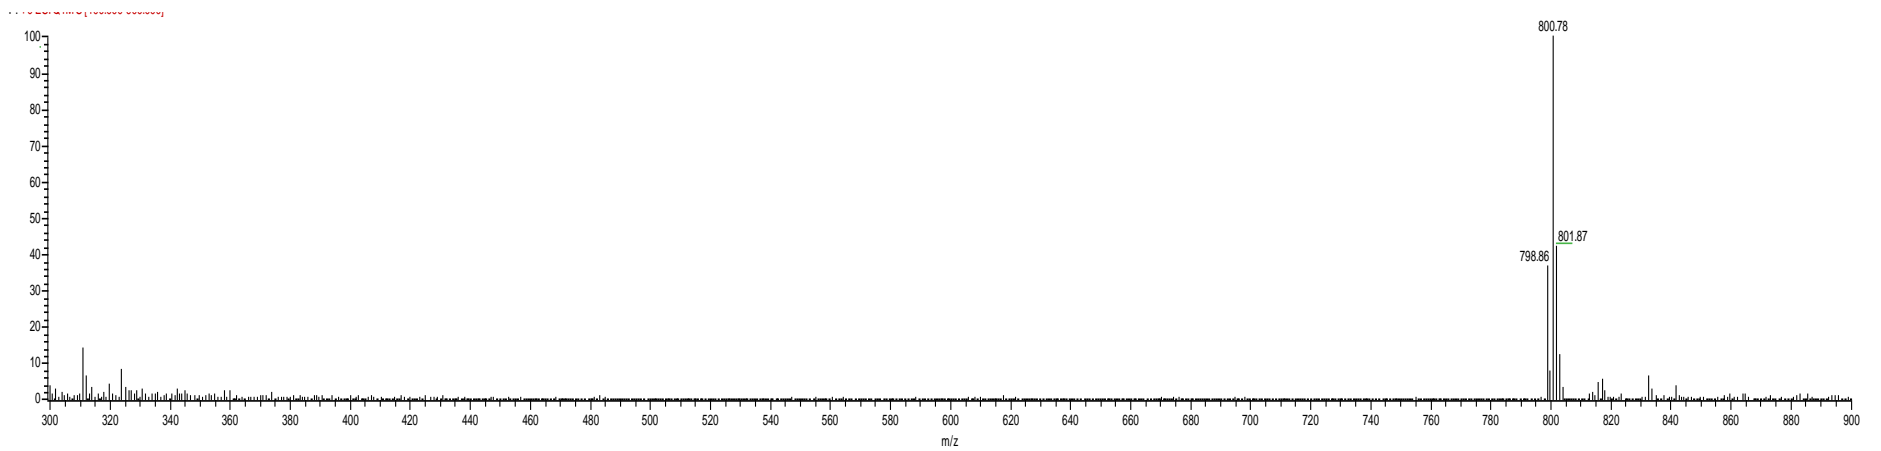

Supplement: s1 [file s1]
