# Supplementary material for: Acylated Flavone O-Glucuronides from the Aerial Parts of Nepeta curviflora
Source: MDPI journal article supplement (doi:10.3390/molecules25173782), 2020-08-20
Supplement: s1 [file s1]

**Table S1:** Chromatographic (HPLC) and spectral (UV and MS) data recorded for **1–6** from *Nepeta curviflora*.

| Compound | $t_R$ (min) | UV ( $\lambda_{\max}$ ) (nm) | Molecular mass $[MH]^+$ |            |
|----------|-------------|------------------------------|-------------------------|------------|
|          |             |                              | Observed                | Calculated |
| <b>1</b> | 31.5        | 332, 267, 220                | 813.1881                | 813.1878   |
| <b>2</b> | 29.6        | 344, 250, 209                | 829.1830                | 829.1827   |
| <b>3</b> | 31.5        | 330, 230                     |                         |            |
| <b>4</b> | 14.0        | 330, 225                     |                         |            |
| <b>5</b> | 34.2        | 337, 268                     |                         |            |
| <b>6</b> | 25.7        | 338, 267                     |                         |            |

**Table S2:**  $^1\text{H}$  and  $^{13}\text{C}$  spectral data (ppm) and coupling constants (Hz) for compounds **3** and **4** dissolved in DMSO-D6 at 25°C.

|                    | <b>3 (<math>^1\text{H}</math>)</b> | <b>3 (<math>^{13}\text{C}</math>)</b> | <b>4 (<math>^1\text{H}</math>)</b> | <b>4 (<math>^{13}\text{C}</math>)</b> |
|--------------------|------------------------------------|---------------------------------------|------------------------------------|---------------------------------------|
| C=O                |                                    | 166.07                                |                                    | 166.07                                |
| $\alpha$           | 6.26 <i>d</i> 15.9                 | 113.03                                | 6.26 <i>d</i> 15.9                 | 113.03                                |
| $\beta$            | 7.48 <i>d</i> 15.9                 | 146.53                                | 7.48 <i>d</i> 15.9                 | 146.53                                |
| 1                  |                                    | 125.46                                |                                    | 125.46                                |
| 2                  | 7.06 <i>d</i> 2.2                  | 115.10                                | 7.10 <i>d</i> 2.2                  | 115.10                                |
| 3                  |                                    | 144.30                                |                                    | 144.30                                |
| 4                  |                                    | 148.91                                |                                    | 148.91                                |
| 5                  | 6.77 <i>d</i> 8.2                  | 115.94                                | 6.77 <i>d</i> 8.2                  | 115.94                                |
| 6                  | 7.01 <i>dd</i> 2.2, 8.2            | 121.91                                | 7.07 <i>dd</i> 2.2, 8.2            | 121.91                                |
| C=O                |                                    | 170.11                                |                                    |                                       |
| $\alpha$           | 5.12 <i>dd</i> 2.2, 7.7            | 72.93                                 |                                    |                                       |
| $\beta_{\text{A}}$ | 2.95 <i>m</i>                      | 36.35                                 |                                    |                                       |
| $\beta_{\text{B}}$ | 2.95 <i>m</i>                      |                                       |                                    |                                       |
| 1'                 |                                    | 126.82                                |                                    |                                       |
| 2'                 | 6.65 <i>d</i> 2.1                  | 116.82                                |                                    |                                       |
| 3'                 |                                    | 145.78                                |                                    |                                       |
| 4'                 |                                    | 144.16                                |                                    |                                       |
| 5'                 | 6.64 <i>d</i> 8.1                  | 115.61                                |                                    |                                       |
| 6'                 | 6.49 <i>dd</i> 2.1, 8.1            | 120.25                                |                                    |                                       |
| OCH <sub>3</sub>   | 3.63 <i>s</i>                      | 52.15                                 |                                    |                                       |

**Table S3.**  $^1\text{H}$  and  $^{13}\text{C}$  NMR chemical shift values of apigenin (**5**) and apigenin 7-*O*- $\beta$ -glucuronopyranoside (**6**) in DMSO- $\text{D}_6$  at 298 K.

|                                            | <b>5</b>              | <b>5</b>                 | <b>6</b>                      | <b>6</b>                 |
|--------------------------------------------|-----------------------|--------------------------|-------------------------------|--------------------------|
|                                            | $\delta$ $^1\text{H}$ | $\delta$ $^{13}\text{C}$ | $\delta$ $^1\text{H}$         | $\delta$ $^{13}\text{C}$ |
| 2                                          |                       | 163.6                    |                               | 164.38                   |
| 3                                          | 6.77 <i>s</i>         | 102.9                    | 6.85 <i>s</i>                 | 103.22                   |
| 4                                          |                       | 181.9                    |                               | 182.11                   |
| 5                                          |                       | 161.6                    |                               | 161.23                   |
| 6                                          | 6.18 <i>d</i> 2.1     | 98.9                     | 6.44 <i>d</i> 2.2             | 99.64                    |
| 7                                          |                       | 164.2                    |                               | 163.07                   |
| 8                                          | 6.48 <i>d</i> 2.1     | 94.0                     | 6.82 <i>d</i> 2.2             | 94.96                    |
| 9                                          |                       | 157.3                    |                               | 157.06                   |
| 10                                         |                       | 103.8                    |                               | 105.46                   |
| 1'                                         |                       | 121.3                    |                               | 121.15                   |
| 2'/6'                                      | 7.92 ' <i>d</i> ' 8.9 | 128.6                    | 7.94 ' <i>d</i> ' 8.9         | 128.72                   |
| 3'/5'                                      | 6.92 ' <i>d</i> ' 8.9 | 116.1                    | 6.93 ' <i>d</i> ' 8.9         | 116.12                   |
| 4'                                         |                       | 161.3                    |                               | 161.48                   |
| 5-OH                                       | 12.95 <i>s</i>        |                          | 12.95 <i>s</i>                |                          |
| 7-OH                                       | 10.88 <i>s</i>        |                          |                               |                          |
| 4'-OH                                      | 10.38 <i>s</i>        |                          | 10.40 <i>s</i>                |                          |
| 7- <i>O</i> - $\beta$ -glucuronopyranoside |                       |                          |                               |                          |
| 1''                                        |                       |                          | 5.06 <i>d</i> 7.7             | 100.03                   |
| 2''                                        |                       |                          | 3.26 <i>dd</i> 7.7, 9.0       | 73.22                    |
| 3''                                        |                       |                          | 3.30 <i>t</i> 9.0             | 76.56                    |
| 4''                                        |                       |                          | 3.18 <i>dd</i> 9.6, 9.0       | 69.68                    |
| 5''                                        |                       |                          | 3.44 <i>ddd</i> 2.1, 5.8, 9.6 | 77.29                    |
| 6A''                                       |                       |                          | 3.71 <i>dd</i> 2.1, 11.9      | 60.73                    |
| 6B''                                       |                       |                          | 3.48 <i>dd</i> 5.9, 11.9      |                          |

**Table S4:** Solvent composition and elution volumes used for separation of XAD-7 purified extract of aerial parts of *Nepeta curviflora* using a 100×5 cm Sephadex LH-20 column. The flow rate was 4 mL/min

| Solvents   | Solvent composition<br>Acetonitrile:H <sub>2</sub> O:TFA | Fractions<br>collected | Volume eluted<br>mL |
|------------|----------------------------------------------------------|------------------------|---------------------|
| <b>So1</b> | 10:90:0.5                                                | 1-2                    | 280                 |
| <b>So2</b> | 20:80:0.5                                                | 3-8                    | 1015                |
| <b>So3</b> | 30:80:0.5                                                | 9-20                   | 2047                |
| <b>So4</b> | 40:60:0.5                                                | 21-26                  | 1043                |
| Solvents   | Solvent composition<br>MeOH:H <sub>2</sub> O:TFA         |                        | Vol. eluted<br>mL   |
| <b>So5</b> | 70:30:0.5                                                | 27-34                  | 1137                |
| <b>So6</b> | 80:20:0.5                                                | 35-39                  | 904                 |
| <b>So7</b> | 90:10:0.5                                                | 40-50                  | 2304                |

**Table S5:** Composition and elution volumes used for separation of XAD-7 purified extract of flowers of *Nepeta curviflora* using a 100×5 cm Sephadex LH-20 column. The flow rate was 4 mL/min

| Solvents   | Solvent composition<br>MeOH:H <sub>2</sub> O:TFA | Vol. eluted<br>mL |
|------------|--------------------------------------------------|-------------------|
| <b>So1</b> | 20:80:0.5                                        | 570               |
| <b>So2</b> | 30:70:0.5                                        | 1079              |
| <b>So3</b> | 35:65:0.5                                        | 559               |
| <b>So4</b> | 40:60:0.5                                        | 485               |
| <b>So5</b> | 45:55:0.5                                        | 348               |
| <b>So6</b> | 50:50:0.5                                        | 333               |
| <b>So7</b> | 60:80:0.5                                        | 317               |
| <b>So8</b> | 70:30:0.5                                        | 1344              |
| <b>So9</b> | 80:20:0.5                                        | 1915              |

**Table S6:** *In-vitro* anti-bacterial activity data for compound 1 and 2 and for the XAD purified materials against gram-negative bacteria. Inhibition zone diameter is in millimetre.

| Compounds            | Conc. mg/mL | <i>E. coli</i> | <i>K. pneumoniae</i> | <i>p. mirabilis</i> | <i>p. aeruginosa</i> |
|----------------------|-------------|----------------|----------------------|---------------------|----------------------|
| Gentamycin           | 6           | 33.0           | 35.0                 | 32.3                | 30.7                 |
| Erythromycin         | 6           | 24.7           | 24.0                 | 19.0                | -                    |
| DMSO                 | -           | -              | -                    | -                   | -                    |
| XAD purified extract | 6           | -              | -                    | -                   | -                    |
| cpd 1                | 6           | -              | -                    | -                   | -                    |
| cpd 2                | 6           | -              | -                    | -                   | -                    |

**Table S7:** *In-vitro* anti-bacterial activity data for compounds 1 and 2 and for the XAD purified materials against gram positive bacteria. Inhibition zone diameter is in millimetre

| Compounds            | Conc. mg/mL | <i>S. aureus</i> | <i>M. Luteus</i> | <i>B. subtilis</i> | <i>E. faecalis</i> | <i>S. epidemidis</i> |
|----------------------|-------------|------------------|------------------|--------------------|--------------------|----------------------|
| Gentamycin           | 6           | 30.3             | 37.7             | 39.3               | -                  | 39.7                 |
| Erythromycin         | 6           | 44.0             | 40.3             | -                  | -                  | 32.3                 |
| DMSO                 | -           | -                | -                | -                  | -                  | -                    |
| XAD purified extract | 6           | -                | 6.7              | -                  | -                  | -                    |
| cpd 1                | 6           | -                | -                | -                  | -                  | -                    |
| cpd 2                | 6           | -                | -                | -                  | -                  | -                    |
